# Genetic architecture of a body color cline in *Drosophila americana*

Lisa L. Sramkoski<sup>1\*</sup>, Wesley N. McLaughlin<sup>2\*</sup>, Arielle M. Cooley<sup>2</sup>, David C. Yuan<sup>1</sup>, Alisha John<sup>1</sup>, and Patricia J. Wittkopp<sup>1,2</sup>

\*These authors contributed equally to this work.

<sup>1</sup>Department of Molecular, Cellular, and Developmental Biology

<sup>2</sup>Department of Ecology and Evolutionary Biology

University of Michigan, Ann Arbor, MI 48109-1048

Keywords: *tan*, *ebony*, genetic heterogeneity, evolution, pigmentation, *Drosophila novamexicana*

Corresponding author:

Patricia J. Wittkopp

1105 North University Avenue

Ann Arbor, MI 48109-1048

Fax: 734.763.0544

Email: [wittkopp@umich.edu](mailto:wittkopp@umich.edu)

Running title: Genetics of body color in *D. americana*

1 **Abstract**

2 Phenotypic variation within a species is often structured geographically in clines. In  
3 *Drosophila americana*, a longitudinal cline for body color exists within North America  
4 that appears to be due to local adaptation. The *tan* and *ebony* genes have been  
5 hypothesized to contribute to this cline, with alleles of both genes that lighten body  
6 color found in *D. americana*. These alleles are similar in sequence and function to the  
7 allele fixed in *D. americana*'s more lightly pigmented sister species, *Drosophila*  
8 *novamexicana*. To test this hypothesis, we examined the frequency and geographic  
9 distribution of *D. novamexicana*-like alleles of *tan* and *ebony* in *D. americana*. Among  
10 alleles from over 100 strains of *D. americana* isolated from 21 geographic locations,  
11 we failed to identify additional alleles of *tan* or *ebony* with as much sequence similarity  
12 to *D. novamexicana* as the alleles previously described. However, using genetic  
13 analysis of 51 *D. americana* strains derived from 20 geographic locations, we identified  
14 one new allele of *ebony* and one new allele of *tan* segregating in *D. americana* that are  
15 functionally equivalent to the *D. novamexicana* allele. An additional 5 alleles of *tan* also  
16 showed marginal evidence of functional similarity. Given the rarity of these alleles,  
17 however, we conclude that they are unlikely to be driving the pigmentation cline.  
18 Indeed, phenotypic distributions of the 51 backcross populations analyzed indicate a  
19 more complex genetic architecture, with diversity in the number and effects of loci  
20 altering pigmentation observed both within and among populations of *D. americana*.  
21 This genetic heterogeneity poses a challenge to association studies and genomic  
22 scans for clinal variation, but might be common in natural populations.

23

24

## 25 **Introduction**

26 A phenotypic cline describes a gradient of trait variation across geographic space  
27 (Huxley 1938). Such clinal variation often correlates with latitude, longitude or altitude,  
28 which in turn correlate with environmental factors such as temperature, light, and  
29 humidity. Clinal trait variation can arise neutrally from reduced gene flow between  
30 geographically distant populations, but natural selection favoring adaptation to varying  
31 local environments is more often thought to be responsible -- especially when there is  
32 ongoing gene flow among populations (Endler 1977). Genetic variation underlying clinal  
33 trait variation is frequently sought by searching for matching allele frequency clines, but  
34 this strategy is known to produce many false positives (Lotterhos & Whitlock 2015;  
35 François *et al.* 2016). Incorporating knowledge of gene function can help overcome this  
36 limitation by identifying loci most likely to contribute to trait variation (Stinchcombe &  
37 Hoekstra 2007; Fournier-Level *et al.* 2011; Hancock *et al.* 2011; Marjoram *et al.* 2013).  
38 Genome scans can also miss loci contributing to clinal trait variation when traits are  
39 controlled by many genes: for such polygenic traits, multiple genotypes can often  
40 produce the same phenotype (genetic heterogeneity), which complicates expected  
41 allelic variation across a cline (Kawecki & Ebert 2004; Pritchard & Di Rienzo 2010;  
42 Savolainen *et al.* 2013; Adrion *et al.* 2015; Haasl & Payseur 2016). Here, we use a more  
43 targeted approach to investigate the genetic basis of clinal trait variation by directly  
44 examining the role of two genes known to affect development of a clinally varying,  
45 polygenic trait. More specifically, we examine the contributions of divergent *tan* and  
46 *ebony* alleles to clinal variation of body color in *Drosophila americana*.

47

48 The genetic basis of pigmentation differences within and between species has been  
49 studied extensively within *Drosophila* (Massey & Wittkopp 2016), and pigmentation  
50 clines for body color have been reported for many species (e.g., David *et al.* 1985;  
51 David & Capy 1988; Hollocher *et al.* 2000; Pool & Aquadro 2007; Wittkopp *et al.* 2011;  
52 Telonis-Scott *et al.* 2011). Selection pressures driving these pigmentation clines seem  
53 to vary among species, with adaptation proposed to be linked to variation in UV  
54 radiation, temperature, and/or humidity (David & Capy 1988; True 2003; Brisson *et al.*  
55 2005; Rajpurohit *et al.* 2008; Wittkopp & Beldade 2009; Clusella-Trullas & Terblanche  
56 2011; Parkash *et al.* 2012; Matute & Harris 2013; Bastide *et al.* 2014; Sillero *et al.* 2014;  
57 Rajpurohit & Schmidt 2019; Davis & Moyle 2019). In *D. americana*, which is found in the  
58 United States from the Atlantic coast to just east of the Rocky Mountains, pigmentation  
59 varies along a longitudinal cline, with the darkest body color seen among the most  
60 eastern populations (Wittkopp *et al.* 2011). This pigmentation cline is observed despite  
61 little evidence of population structure in *D. americana* and signatures of extensive gene  
62 flow throughout the species range (Schäfer *et al.* 2006; Morales-Hojas *et al.* 2008;  
63 Fonseca *et al.* 2013), suggesting it is due to local adaptation (Wittkopp *et al.* 2011). *D.*  
64 *americana*'s closest living relative, *D. novamexicana*, is found in the southwestern  
65 United States, west of the Rocky Mountains, and has evolved an even lighter body  
66 color, consistent with an extension of the *D. americana* pigmentation cline (Wittkopp *et*  
67 *al.* 2011). Although *D. americana* and *D. novamexicana* show evidence of reproductive  
68 isolation (Ahmed-Braimah & McAllister 2012), these two species are still able to mate  
69 and produce fertile offspring in the lab, allowing genetic dissection of their divergent  
70 phenotypes.

71

72 Pigmentation differences between *D. americana* and *D. novamexicana* have been  
73 linked to divergent alleles of two classic pigmentation genes, *ebony* and *tan*, with  
74 genomic regions containing these two genes explaining ~87% of the pigmentation  
75 difference (Wittkopp *et al.* 2003; 2009; Cooley *et al.* 2012). Proteins encoded by *ebony*  
76 and *tan* are required for pigment synthesis in *Drosophila* and catalyze opposite  
77 directions of a reversible biochemical reaction converting dopamine to N-beta-alanyl  
78 dopamine and vice versa (True *et al.* 2005; Massey & Wittkopp 2016). For *tan*,  
79 functionally divergent sites have been mapped to the first intron (Wittkopp *et al.* 2009)  
80 and allele-specific expression analysis in F<sub>1</sub> hybrids (Wittkopp *et al.* 2004) suggests that  
81 this divergence affects *cis*-regulation of *tan* expression (Cooley *et al.* 2012). Evidence of  
82 *cis*-regulatory divergence between *D. americana* and *D. novamexicana* has also been  
83 detected for *ebony* using allele-specific expression assays (Cooley *et al.* 2012);  
84 however, the specific sites responsible for this divergence have been difficult to localize  
85 because *ebony* is located in a region of the genome inverted between *D. novamexicana*  
86 and *D. americana* (Wittkopp *et al.* 2009). Recent work using CRISPR/Cas9 genome  
87 editing to generate *ebony* mutants in both *D. americana* and *D. novamexicana*,  
88 however, has shown using reciprocal hemizyosity testing that divergent *ebony* alleles  
89 are indeed responsible for pigmentation differences between these two species (Lamb  
90 *et al.* 2020).

91  
92 The contribution of *ebony* and *tan* to pigmentation differences between *D. americana*  
93 and *D. novamexicana* suggests that one or both of these genes might also contribute to  
94 variable pigmentation within *D. americana*. Consistent with this possibility, prior work  
95 identified a strain of *D. americana* (DN2) with an allele of *ebony* that shares both

96 sequence and function with the *D. novamexicana* allele (Wittkopp *et al.* 2009). A  
97 different strain of *D. americana* (A01) was found to carry an allele of *tan* with sequence  
98 and function similar to the *D. novamexicana* allele (Wittkopp *et al.* 2009). These alleles  
99 seem to have arisen prior to speciation (Wittkopp *et al.* 2009), suggesting that they were  
100 segregating in *D. americana* prior to the divergence of *D. novamexicana*. Based on  
101 these data, we hypothesized that differences in the frequency of one or both of these *D.*  
102 *novamexicana*-like alleles among *D. americana* populations might contribute to this  
103 species' pigmentation cline. Here, we test this hypothesis by searching over 100 strains  
104 of *D. americana* for additional alleles of *ebony* and/or *tan* that share similar amounts of  
105 sequence identity and/or function to the *D. novamexicana* allele. We then test for  
106 associations between pigmentation and segregating sites sampled in *ebony* and *tan*.  
107 Finally, we analyze pigmentation phenotypes of backcross populations between *D.*  
108 *novamexicana* and 51 strains of *D. americana* to determine how the genetic architecture  
109 of body color differs among strains. We find that *D. novamexicana*-like alleles of *ebony*  
110 and *tan* are unlikely to explain the body color cline in *D. americana*, and that the genetic  
111 architecture is more complex than anticipated, with genetic heterogeneity apparently  
112 common within populations affected by local adaptation. These observations suggest  
113 that genomic scans for variation in allele-frequencies would fail to find loci underlying  
114 this phenotypic cline, as has been predicted for clinally varying polygenic traits  
115 (Pritchard & Di Rienzo 2010; Savolainen *et al.* 2013; Adrion *et al.* 2015; Haas &  
116 Payseur 2016).

117

## 118 **Materials and Methods**

119 *Fly strains used for sequence analysis*

120 A summary of fly strains used for sequence analysis is provided in Supplementary  
121 Table 1. The “A01” strain of *D. americana* (15010-0951.01) and “N14” strain of *D.*  
122 *novamexicana* (15010-1031.14) were obtained from the Drosophila Species Stock  
123 Center (Tucson, AZ). The remaining 112 strains of *D. americana* were generously  
124 provided by Dr. Bryant McAllister (University of Iowa), who collected the progenitors of  
125 these isofemale lines from wild populations between 1996 and 2007 at 21 sites sampled  
126 within the population range of *D. americana* in the United States. All flies were reared on a  
127 diet of standard yeast-glucose media at 20°C. Please note that we refer to different  
128 collection sites as different populations in the main text for simplicity even though  
129 patterns of sequence variation show no evidence of population structure in *D.*  
130 *americana* other than for chromosomal fusions and inversions (Schäfer *et al.* 2006;  
131 Morales-Hojas *et al.* 2008; Wittkopp *et al.* 2011; Fonseca *et al.* 2013).

132

### 133 *DNA sequence analysis*

134 We PCR amplified and Sanger sequenced 579 bp of *ebony* spanning exons 5-8 and  
135 1328 bp of *tan* from intron 1. (Note that we originally targeted the large first intron of  
136 *ebony*, but polymorphisms among strains caused all primer pairs tested to amplify  
137 inconsistently among strains.) After removing low quality bases from raw Sanger  
138 sequence reads based on Phred scores, we aligned sequences of *ebony* from 109  
139 strains of *D. americana* plus 1 strain of *D. novamexicana* and sequences of *tan* from  
140 102 strains of *D. americana* plus 1 strain of *D. novamexicana* using the ClustalW  
141 algorithm (Thompson *et al.* 1994) in CodonCode Aligner (version 8.0.2,  
142 <https://www.codoncode.com/>); sequence was obtained for both genes from 99 strains of  
143 *D. americana* (Supplementary Table 1). Only a single strain of *D. novamexicana* was

144 analyzed in this work because prior work has shown very low levels of polymorphism in  
145 this species (Orsini *et al.* 2004; Caletka & McAllister 2004; Wittkopp *et al.* 2009).  
146 Sequence alignments used for analysis are provided as Supplementary File 1 (*ebony*)  
147 and Supplementary File 2 (*tan*) and were submitted to GenBank with ID numbers  
148 MT350927 - MT351036 for *ebony* and MT350824 - MT350926 for *tan*.

149

#### 150 *Gene trees and haplotype network analysis*

151 Phylogenetic trees inferring evolutionary relationships among the alleles sampled for  
152 *ebony* and *tan* were produced using the Maximum Likelihood method based on the  
153 Tamura-Nei model of nucleotide substitutions (Tamura & Nei 1993) in MEGA7 (Kumar  
154 *et al.* 2016). A bootstrap consensus tree was inferred from 100 replicates (Felsenstein  
155 1985), with branches supported by less than 50% of the replicates collapsed. As  
156 described in MEGA7, trees used to start the heuristic search were generated using the  
157 Neighbor-Join and BioNJ algorithms, with pairwise distances estimated using the  
158 Maximum Composite Likelihood (MCL) approach. Topologies with superior log  
159 likelihood values were then selected as initial trees. Sites for which 5% of the strains  
160 had alignment gaps, missing data, or ambiguous bases were excluded from this  
161 analysis. Because linkage disequilibrium is low within *D. americana* (Wittkopp *et al.*  
162 2009), we also assessed the sequence similarity among alleles using Median Spanning  
163 Networks (Bandelt *et al.* 1999) (as implemented in PopART ([www.popart.otago.ac.nz](http://www.popart.otago.ac.nz);  
164 March 15, 2015 version, downloaded September 12, 2019) with the epsilon parameter  
165 set to 0.

166

#### 167 *Fly strains used for genetic analysis*



168 The genetic basis of pigmentation differences between *D. americana* and *D. novamexicana*  
169 was examined for 51 of the *D. americana* strains established and provided by Dr. Bryant  
170 McAllister (University of Iowa) (McAllister *et al.* 2008; Sheeley & McAllister 2008). As shown  
171 in Supplementary Table 1, these strains of *D. americana* included 5 strains from each of two  
172 locations, 4 strains from each of two locations, 3 strains from each of six locations, 2 strains  
173 from each of five locations, and 1 strain from each of five locations. The eastern-most  
174 location was Killbuck, Ohio (40.711809, -82.005472), the western- and northern-most  
175 location was Niobrara, Nebraska (42.74821, -98.051519), and the southern-most  
176 collection site was Sneads, Florida (30.708495, -84.910637). Together, these 51 strains  
177 came from 20 of the 21 locations from which strains included in the sequence analysis  
178 described above were derived (Supplementary Table 1).

179

#### 180 *Fly crosses for genetic analysis*

181 Virgin females were isolated from each of the 51 strains of *D. americana* used for  
182 genetic analysis and mated with *D. novamexicana* males to create F<sub>1</sub> hybrids. From  
183 each of these F<sub>1</sub> hybrid populations, virgin females were again collected and then  
184 mated to *D. novamexicana* males. Male flies were collected from the (BC<sub>1</sub>) progeny  
185 produced by each backcross within 3 days of eclosion and aged for one week to  
186 ensure pigmentation was fully developed. Each of these BC<sub>1</sub> males carried an X  
187 chromosome and one copy of each autosome that was a unique recombination of  
188 alleles from the *D. novamexicana* and *D. americana* strains crossed to generate its F<sub>1</sub>  
189 hybrid mother. These different recombinant chromosomes caused pigmentation to vary  
190 among BC<sub>1</sub> flies from each cross. The Y chromosome and the other copy of each  
191 autosome in the BC<sub>1</sub> males was always inherited from the *D. novamexicana* father.

192

### 193 *Phenotyping Pigmentation in Backcross Progeny*

194 For each backcross population, pigmentation of 27 to 117 (mean = 63.5) male BC<sub>1</sub> flies  
195 7-10 day old were scored based on the color visible in the dorsal abdominal cuticle of  
196 live flies. We found that pigmentation phenotypes did not vary continually in these  
197 backcross populations, but rather fell into distinct classes, consistent with prior work  
198 (Wittkopp *et al.* 2003; 2009). The number of distinct pigmentation classes used to  
199 score each backcross population was based on the number of distinct pigmentation  
200 phenotypes observed: we observed four to eight distinct classes of pigmentation  
201 phenotypes in each of the 51 BC<sub>1</sub> populations. The lightest class was always  
202 designated as category “1” with increasing class numbers corresponding to  
203 progressively darkening pigmentation. For example, in a backcross population with four  
204 total pigmentation classes, class “4” would contain the darkest flies, whereas in a  
205 backcross population with seven total pigmentation classes, class “4” would contain  
206 flies with mid-range pigmentation. The number of pigmentation classes as well as the  
207 assignment of individual flies to a particular pigmentation class was determined by  
208 independent observations from at least two researchers. These pigmentation  
209 phenotype scores are shown for each fly in Supplementary Table 3.

210

### 211 *DNA Extractions*

212 From each of the 51 backcross populations, DNA was extracted from each male BC<sub>1</sub> fly  
213 using a method similar to that described in Gloor *et al.* (1993) except that the protocol  
214 was scaled for efficient processing of 3238 flies. Briefly, each fly was placed into a well  
215 of a 96-well plate (GeneMate# T3031-21) with a glass bead and 50µL of a 1:99

216 Proteinase K/Engel's Buffer solution. Plates were sealed and shaken in a Qiagen  
217 Retsch MM301 Tissue Lyser until the glass bead had pulverized the fly in each well.  
218 The plates were then incubated at 37°C for 30 minutes to allow protein digestion and  
219 then incubated at 95°C for 2 minutes to inactivate Proteinase K. Extracted DNA was  
220 stored at 4°C until used for genotyping.

221

## 222 *Genotyping*

223 Molecular genotyping assays were used to determine whether each of the BC<sub>1</sub> males  
224 scored for pigmentation carried the *D. americana* and/or *D. novamexicana* alleles of  
225 three pigmentation genes: *yellow*, *tan*, and *ebony*. Because *yellow* and *tan* are located  
226 on the X chromosome, each male carried only one species' allele, either the mother's or  
227 the father's allele. By contrast, because *ebony* is located on an autosome, BC<sub>1</sub> males  
228 could either be heterozygous for the *D. americana* and *D. novamexicana* alleles or  
229 homozygous for the *D. novamexicana* allele.

230 For *yellow* and *tan*, differences in length between PCR products amplified from  
231 the *D. americana* and *D. novamexicana* alleles were used to genotype BC<sub>1</sub> flies. For  
232 *tan*, a forward primer (5'-CGAGTTTTTATTCCCACTGAATTAT-3') and a reverse primer  
233 (5'-GGGTTCGTCTTATCCACGAT-3') were used to amplify a 100bp product for the *D.*  
234 *americana tan* allele and a 64bp product for the *D. novamexicana tan* allele. For *yellow*,  
235 depending on which *D. americana* strains was used to generate the BC<sub>1</sub> males being  
236 genotyped, one of two forward primers was used [*yellow* forward-1 (5'-  
237 CCAAAGGACAACCGAGTTT-3') or *yellow* forward-2 (5'-  
238 CTAACATGCCTGAAAATCAATCACGGA-3')] with a *yellow* reverse primer (5'-  
239 AGTCGATTGCCAAAGTGCTC-3'). These different forward primers were necessary

240 because of differences in *yellow* DNA sequence among the *D. americana* strains. For  
241 most backcross populations, the *yellow* forward-1 primer paired with the *yellow* reverse  
242 primer generated a 349bp product for the *D. americana yellow* allele and a 372bp  
243 product for the *D. novamexicana yellow* allele. The *yellow*-forward-2 primer was used to  
244 analyze BC<sub>1</sub> males from the six strains of *D. americana* (IR0436, LR0540, FP9946,  
245 DI0562 MK0738, and SC0708) for which the *yellow* forward-1 primer and *yellow* reverse  
246 primer did not produce any visible differences in length between the *D. americana* and  
247 *D. novamexicana* alleles. For these six strains, genotyping was performed by using the  
248 *yellow* forward-2 primer and the *yellow* reverse primer to amplify a region of *yellow*  
249 using PCR and then digesting the PCR product with DraI, which cut only the *D.*  
250 *novamexicana yellow* allele. All digested and undigested PCR products were run on 2%  
251 agarose gels and visualized using Ethidium Bromide.

252 For *ebony*, we were unable to identify PCR products that were easily  
253 distinguishable for *D. americana* and *D. novamexicana* alleles through either amplicon  
254 length or restriction digest. Therefore, we genotyped flies at the *ebony* locus using  
255 pyrosequencing (Ahmadian *et al.* 2000). The PCR product used for pyrosequencing  
256 was generated using the forward primer, 5'-AGCCCGAGGTGGACATCA-3', and the  
257 biotinylated reverse primer, 5'-\*GTATGGGTCCCTCGCAGAA-3' (\* notates biotinylation).  
258 These PCR products were processed, and pyrosequencing performed, as described in  
259 Wittkopp *et al.* (2008). The pyrosequencing primer used had the sequence 5'-  
260 CGAGGTGGACATCAAGT-3'. This pyrosequencing assay for *ebony* used two single  
261 nucleotide differences to differentiate between the *D. americana* and *D. novamexicana*  
262 *ebony* alleles. Specifically, the sequences analyzed by pyrosequencing were 5'-  
263 CCAAGCT**G**GCT-3' for the *D. americana* allele and 5'-CGAAGCTTCT-3' for the *D.*

264 *novamexicana* allele, where the bolded letters indicate bases used to discriminate  
265 between the two alleles.

266 Genotyping data for *yellow*, *tan*, and *ebony* in the BC<sub>1</sub> males is summarized in  
267 Supplementary Table 4, where 0 = hemizygous for the *D. americana* allele for *yellow*  
268 and *tan* and heterozygous for *ebony* and 1 = hemizygous *D. novamexicana* allele for  
269 *yellow* and *tan* and homozygous for *ebony*. The 96-well plate containing the DNA  
270 sample from each fly is also indicated in Supplementary Table 4.

271  
272 *Comparing function of D. americana ebony, tan, and yellow alleles to D. novamexicana*  
273 To determine whether the *D. americana* allele of *yellow*, *tan*, and/or *ebony* from each of  
274 the 51 strains of *D. americana* examined was functionally equivalent to the *D.*  
275 *novamexicana* allele of the same gene, we calculated the difference between the mean  
276 pigmentation scores of flies inheriting the *D. americana* or *D. novamexicana* allele from  
277 their mother in each backcross population. Statistical significance of this difference was  
278 assessed for each gene in each backcross using a null distribution of pigmentation  
279 differences generated from 10,000 permuted datasets in which the genotypes of the  
280 focal gene were shuffled relative to the pigmentation phenotypes. The null hypothesis  
281 tested by these permutations was that the *D. americana* and *D. novamexicana* alleles  
282 of the focal gene had indistinguishable effects on pigmentation (i.e., that the two alleles  
283 are functionally equivalent). This method of testing for statistical significance directly  
284 accounts for the differences in sample sizes and allele frequencies among  
285 backcrosses. A correction for multiple testing was performed with the `p.adjust` function  
286 with the `method=fdr` option, which implements the false discovery rate correction as

287 described in Benjamini & Hochberg (1995). These adjusted p-values are reported in  
288 Supplementary Table 5.

289

### 290 *Association testing*

291 To test for an association between pigmentation and segregating sites in *tan* and  
292 *ebony*, we used a more quantitative, continuous measure of pigmentation than the  
293 pigmentation classes described for backcross populations above. This pigmentation  
294 data came from dataset B in Wittkopp et al. (2011) for strains from the DN, II, MK, NN,  
295 OC, SC, and WS populations. For the remaining strains, we generated comparable  
296 quantitative measurements of pigmentation using the same protocol as described for  
297 dataset B in Wittkopp et al. (2011). Briefly, a custom-built fiber optic probe was used to  
298 measure light reflected off the fly's abdominal cuticle, with 5 measurements taken per  
299 fly and 6-20 flies analyzed per strain. A WS-1 Diffuse Reflection Standard (Ocean  
300 Optics) was used to calibrate the probe for each set of measurements and strains were  
301 scored in a random order. To minimize the effects of outlier measurements, the median  
302 measure of pigmentation observed for each fly was used for analysis. These medians  
303 (Supplementary Table 2) were fitted to a linear model including strain as a fixed effect  
304 and replicate fly as a random effect with *lmer* function in the *lme4* R package, and the  
305 least-square means were extracted for each strain using the *lsmeans* function in the  
306 *lsmeans* R package.

307

308 Variable sites were then identified in *tan* and *ebony* using the same sequence  
309 alignments used for phylogenetic analysis (Supplementary Files 1 and 2). Sites with  
310 the minor allele present in less than 5 strains as well as sites containing indels were

311 excluded prior to association testing. Each of the remaining variable sites for *tan* (N =  
312 74) and *ebony* (N = 40) was then tested for an association with pigmentation by fitting  
313 the lsmean estimate of pigmentation for each strain to a general linear model (function  
314 *glm* in R) containing each of the variable sites as a fixed effect.

315

### 316 *Standardizing pigmentation classes among strains*

317 One representative male fly from each phenotypic class in each backcross was imaged  
318 as a visual reference using a Scion Visicapture 1.2 and Scion Corporation Model CFW-  
319 1308C color digital camera. These images were processed using Photoshop CS6  
320 (Adobe, San Jose, CA), with a constant color adjustment applied to all photos collected  
321 on the same day to control for day-to-day variation in imaging conditions. These  
322 adjustments were performed to make the digital images more closely match the fly's  
323 appearance under the microscope. The parameters for each day's adjustment were  
324 determined based on images of a set of standards consisting of seven dissected  
325 abdominal cuticles with a range of pigmentation phenotypes. Photos of these cuticle  
326 standards were collected interleaved within each batch of BC<sub>1</sub> flies. For comparisons  
327 among flies from all 51 backcross populations, we used the representative images from  
328 each category in each backcross to convert backcross-specific pigmentation scores to  
329 a common 8-category pigmentation scale (Supplementary Table 3). After phenotyping,  
330 all flies were stored at -80°C.

331

### 332 *Comparing distributions of backcross phenotypes among strains*

333 Correspondence analysis (CA), which is similar to principal components analysis but for  
334 categorical response variables, was used to reduce the dimensionality of the

335 distributions of pigmentation classes from backcross (BC1) populations among strains.  
336 This analysis was performed using the *CA* function in the *FactoMineR* package (Lê *et*  
337 *al.*, 2008) for R and visualized using *factoextra* R package. We then calculated the  
338 Euclidean distance between strains in the Dimension 1 and Dimension 2 space from  
339 the CA analysis to compare the similarity in backcross pigmentation distributions for  
340 strains that were and were not from the same collection site. Euclidean distances  
341 between all pairs of strains were calculated using the *distances* function in the  
342 *distances* R package.

343

#### 344 *Statistical analyses*

345 R code used for this work is provided in Supplementary File 3. This code was run in  
346 RStudio (Version 1.2.5033) using R version 3.6.2 (2019-12-12).

347

## 348 **Results**

349

350 *Comparing sequence of D. americana ebony and tan alleles to D. novamexicana*  
351 *alleles*

352

353 As described in the Introduction, pigmentation differences between *D. americana* and  
354 *D. novamexicana* (Figure 1A) are primarily due to changes in the *ebony* and *tan*  
355 genes, which control the balance between dark (black and brown) and light  
356 (yellow/tan) pigments (Figure 1B). The DN2 strain of *D. americana* (from Duncan,  
357 Nebraska) and the A01 strain of *D. americana* (from Poplar, Montana) have been  
358 shown to carry alleles of *ebony* and *tan*, respectively, similar in sequence and function



359 to the *D. novamexicana* alleles of these genes (Wittkopp *et al.* 2009). These  
360 observations suggest that differences in the frequency of *D. novamexicana*-like alleles  
361 among populations of *D. americana* might underlie the longitudinal cline of body color  
362 observed within this species. To test this hypothesis, we examined the frequency and  
363 geographic distribution of such alleles first by comparing sequences of *ebony* and *tan*  
364 from over 100 strains of *D. americana* to orthologous sequences from the N14 strain of  
365 *D. novamexicana*. The *D. americana* strains examined were derived from flies  
366 captured at 21 different sites within the United States and included DN2 and A01  
367 (Figure 1C, Supplementary Table 1).

368  
369 Phylogenetic trees built from these sequences using the maximum likelihood method  
370 implemented in MEGA7 (Kumar *et al.* 2016) confirmed that the *ebony* allele from the  
371 DN2 strain of *D. americana* is more similar to the *D. novamexicana* allele than to other  
372 alleles from *D. americana* (Figure 1D). We failed to find, however, any additional *ebony*  
373 alleles from the 109 new strains of *D. americana* sampled that clustered as closely with  
374 *D. novamexicana* (Figure 1D). Similarly, phylogenetic trees confirmed that the *tan*  
375 allele from the A01 strain of *D. americana* was the only allele among those sampled  
376 from 102 strains of *D. americana* that is more closely related to the *D. novamexicana*  
377 allele than to other *D. americana* alleles (Figure 1E). Analyzing these sequences with  
378 Minimum Spanning Networks implemented in PopArt ([www.popart.otago.ac.nz](http://www.popart.otago.ac.nz)) also  
379 showed that the DN2 and A01 alleles of *ebony* and *tan*, respectively, were most similar  
380 to the *D. novamexicana* allele (Supplementary Figures 1 and 2). Taken together, these  
381 data indicate that alleles of *ebony* and *tan* with sequences closely related to the *D.*

382 *novamexicana* allele are rare within *D. americana* and thus unlikely to explain the  
383 pigmentation cline observed.

384

385 *Comparing function of D. americana ebony and tan alleles to D. novamexicana alleles*

386

387 To determine whether other *D. americana* alleles of *ebony* and/or *tan* might have  
388 functional similarity to *D. novamexicana* alleles despite their greater sequence  
389 divergence, we crossed virgin females from 51 strains of *D. americana* derived from 20  
390 populations (Supplementary Table 1) to *D. novamexicana*, and then backcrossed the  
391 F<sub>1</sub> hybrid females to *D. novamexicana* males (Figure 2A). The backcross (BC<sub>1</sub>)  
392 progeny inherited recombinant maternal chromosomes that contain sequences from  
393 both their *D. americana* and *D. novamexicana* parents and paternal chromosomes with  
394 only *D. novamexicana* alleles (Figure 2A). Pigmentation was scored for all male flies in  
395 each backcross population (N = 27 to 117, mean = 63.5), and then each male was  
396 genotyped for *ebony*, *tan*, and another pigmentation gene, *yellow* (Supplementary  
397 Table 2). The *yellow* gene was included as a negative control in this study because  
398 prior work has shown that it does not contribute to pigmentation divergence between  
399 *D. americana* and *D. novamexicana* (Wittkopp *et al.* 2003; 2009).

400

401 Consistent with prior descriptions of backcross populations between *D. americana* and  
402 *D. novamexicana* (Wittkopp *et al.* 2003; 2009), body color did not vary continuously  
403 within the BC<sub>1</sub> populations. Rather, a limited number of distinct pigmentation  
404 categories were observed in each cross. The number of pigmentation classes ranged  
405 from four to eight among backcross populations produced by different strains;

406 examples of pigmentation classes for five strains are shown in Figure 2B. The lightest  
407 (most yellow) body color phenotype in each backcross was assigned to category 1,  
408 with subsequent category numbers corresponding to progressively darker  
409 pigmentation.

410

411 To test for functional divergence of *ebony*, *tan*, or *yellow* alleles between *D.*  
412 *novamexicana* and each strain of *D. americana*, we calculated the difference in mean  
413 pigmentation score between flies that inherited the *D. americana* or *D. novamexicana*  
414 allele of each gene from their mother. For each gene and each BC<sub>1</sub> population, the  
415 statistical significance of the pigmentation difference was determined by comparing it  
416 to a distribution of differences observed in 10,000 permuted datasets in which the  
417 genotypes were shuffled relative to the phenotypes. A false discovery rate correction  
418 for multiple tests (Benjamini & Hochberg 1995) was then applied, and an adjusted p-  
419 value cut-off of 0.05 was used to assess statistical significance. That is, tests with  $P <$   
420 0.05 were interpreted as evidence of functionally divergent alleles between *D.*  
421 *novamexicana* and the *D. americana* strain tested, whereas tests with  $P \geq 0.05$  were  
422 taken as evidence that the *D. novamexicana* and *D. americana* alleles were  
423 functionally equivalent. As expected, *yellow* alleles of *D. americana* and *D.*  
424 *novamexicana* appeared to be functionally equivalent for all strains tested ( $P > 0.14$  in  
425 all cases; Supplementary Table 5; Supplementary Figure 3), further supporting the  
426 observation that *yellow* does not contribute to pigmentation divergence between these  
427 two species.

428

429 For *ebony*, all but one strain of *D. americana* tested showed evidence of functional  
430 divergence between *D. americana* and *D. novamexicana* (Supplementary Table 5;  
431 Supplementary Figure 4). This one exception (strain DN0748x37, Figure 2C) had a p-  
432 value of 0.18, suggesting that the *ebony* allele in this strain is functionally equivalent to  
433 the *D. novamexicana* *ebony* allele. Like the DN2 strain originally found to carry a *D.*  
434 *novamexicana*-like *ebony* allele, the DN0748x37 strain was collected from Duncan,  
435 Nebraska, but it was collected seven years later than the DN2 strain and did not share  
436 as much sequence similarity with the *D. novamexicana* allele as the DN2 allele (Figure  
437 1D, Supplementary Figure 1). These observations suggest that more than one allele of  
438 *ebony* similar to *D. novamexicana* in function is segregating in the Duncan, Nebraska  
439 population. This population is located near the western edge of *D. americana*'s range  
440 (Figure 1C) and has some of the lightest pigmentation observed in *D. americana*  
441 (Wittkopp *et al.* 2011).

442  
443 For *tan*, one strain of *D. americana* (DA0626) showed evidence of being functionally  
444 equivalent to the *D. novamexicana* allele ( $P = 0.16$ , Figure 2D, Supplementary Table 4).  
445 This strain was not any more similar in sequence to the *D. novamexicana* *tan* allele than  
446 other alleles of *D. americana* that showed evidence of functional divergence (Figure 1E,  
447 Supplementary Figure 2). Five other *D. americana* strains showed marginal evidence of  
448 being functionally equivalent to the *D. novamexicana* allele ( $P$ -values = 0.05 or 0.06,  
449 Supplementary Figure 5, Supplementary Table 5). With all other strains showing  $P$ -  
450 values  $< 0.0001$  (Supplementary Table 5), these five alleles are interpreted as being at  
451 least functionally distinct from the majority of *D. americana* *tan* alleles, if not equivalent  
452 to the *D. novamexicana* *tan* allele. Two of these five alleles were found in strains

453 collected from the same population (SC0708, SC0718) near the western edge of the  
454 species range; however, the other three alleles (II0710, G9647, FP9918, DA0626) as  
455 well as the DA0626 allele were found in strains isolated from populations spread  
456 throughout the species range (Figure 1C).

457

458 The frequency and geographic distribution of *ebony* and *tan* alleles similar in function  
459 to their *D. novamexicana* orthologs again suggests that they are unlikely to be primarily  
460 responsible for the pigmentation cline.

461

462 *Testing for associations between pigmentation and variation in ebony and tan*

463

464 Although we found few alleles with sequence and/or function equivalent to *D.*  
465 *novamexicana* segregating within *D. americana*, other alleles of *tan* and/or *ebony*  
466 might still contribute to pigmentation diversity within *D. americana*. To explore this  
467 possibility, we tested whether any of the segregating sites sampled in *tan*  
468 (Supplementary Table 6) or *ebony* (Supplementary Table 7) for our phylogenetic  
469 analysis showed a significant association with estimates of pigmentation for each  
470 strain (Supplementary Table 8). Specifically, we used a general linear model to test  
471 each variable site with a minor allele present in at least five strains (excluding sites  
472 with indels) for a statistically significant association with pigmentation. For *ebony*, the  
473 region sampled started in exon 5 and extended into exon 8, with no statistically  
474 significant associations observed (Figure 3A). Because prior work suggests that the  
475 functional difference between *D. americana* and *D. novamexicana* *ebony* alleles  
476 affects *cis*-regulation (Cooley *et al.* 2012), it is perhaps not surprising that this region,

477 consisting mainly of coding sequences, does not harbor associated variants. We  
478 thought it possible, however, that we might have seen an association with these sites  
479 due to linkage disequilibrium with a variant outside this region because *ebony* is  
480 located in a region of the genome inverted between *D. novamexicana* and most strains  
481 of *D. americana* (Wittkopp:2003bn; Wittkopp *et al.* 2009). For *tan*, prior work has  
482 mapped functionally divergent sites to intron 1 (Wittkopp *et al.* 2009), suggesting that  
483 the region sampled is much more likely to harbor variants that might correlate with  
484 pigmentation. Nonetheless, we also observed no statistically significant associations  
485 between body color and variants in this region segregating within *D. americana* (Figure  
486 3B).

487

#### 488 *Genetic heterogeneity underlying body color variation in D. americana*

489

490 With none of our analyses linking variation in *ebony* and/or *tan* to clinal variation in *D.*  
491 *americana* body color, we sought to further investigate its genetic architecture by  
492 examining the phenotypic distributions of males in the 51 backcross populations.  
493 Because all 51 strains were crossed and then backcrossed to the same strain of *D.*  
494 *novamexicana*, differences in the distribution of pigmentation phenotypes observed  
495 among these BC<sub>1</sub> populations must be due to genetic differences among the strains of  
496 *D. americana*. For example, differences in the number of phenotypic classes observed  
497 among the BC<sub>1</sub> populations indicate that different strains of *D. americana* harbor  
498 different numbers of loci with effects on pigmentation distinct from the *D.*  
499 *novamexicana* alleles. Assuming basic Mendelian segregation, one locus with a  
500 divergent allele affecting pigmentation is expected to cause two distinct pigmentation

501 phenotypes in the backcross population, whereas two loci with divergent alleles are  
502 expected to cause up to four distinct pigmentation phenotypes, and three loci with  
503 divergent alleles could cause up to eight distinct phenotypes. Differences in the BC<sub>1</sub>  
504 pigmentation phenotypes and/or number of pigmentation categories are also expected  
505 to result from variation among the *D. americana* strains in the identity of loci and/or  
506 allelic variation at loci.

507

508 To compare the distributions of BC<sub>1</sub> phenotypes among strains, we first converted the  
509 strain-specific pigmentation categories to a standardized set of pigmentation  
510 categories. We did this by comparing representative images of flies from each strain-  
511 specific category to each other and sorting the images with the most similar  
512 pigmentation into the same category. This process resulted in 8 categories. After  
513 translating the numbers of flies from the strain-specific categories to the standardized  
514 categories (Supplementary Table 3), we examined the distribution of flies among  
515 pigmentation classes for all of the strains. We found that the number of pigmentation  
516 categories in the BC<sub>1</sub> population ranged from 4 (e.g., BU0624) to 8 (WS0712) among  
517 the strains (Supplementary Table 3; Figure 4A), indicating that the number of loci  
518 harboring variation affecting pigmentation is variable within *D. americana*. In addition,  
519 even for strains that produced the same number of phenotypic classes in the  
520 backcross population, differences were observed in the specific pigmentation  
521 phenotypes of each class, indicating that there are also differences in the specific loci  
522 or alleles affecting pigmentation between strains. An example of this can be seen by  
523 comparing strains BU0624 and PM9936: both strains produced backcross populations

524 with 4 pigmentation classes, but flies with light pigmentation were common in the  
525 BU0624 backcross and nonexistent in the PM9936 backcross (Figure 4A).  
526  
527 Finally, we asked whether loci affecting pigmentation were more likely to be more  
528 similar for strains isolated from the same population than from different populations.  
529 Despite evidence of extensive gene flow within *D. americana* (Schäfer *et al.* 2006;  
530 Morales-Hojas *et al.* 2008; Fonseca *et al.* 2013), we expected this might be true for loci  
531 affecting pigmentation because of the longitudinal cline previously observed for body  
532 color (Wittkopp *et al.* 2011). That is, if natural selection is favoring different  
533 pigmentation phenotypes in different populations, we might expect to see more genetic  
534 similarity for loci affecting pigmentation within than between populations. Inspecting the  
535 number of backcross pigmentation categories for strains derived from the same  
536 collection site, however, already suggests this might not be so: the three strains  
537 isolated from the MK population produced backcross progeny with 4, 6, and 7 distinct  
538 pigmentation phenotypes.  
539  
540 To further compare the backcross phenotypes, we used correspondence analysis (CA)  
541 to reduce the dimensionality of the BC<sub>1</sub> phenotypic distributions. This method is similar  
542 to principal components analysis (PCA), but for categorical data. The first two  
543 dimensions of the correspondence analysis (comparable to the first two principle  
544 components in a PCA) captured 55.1% of the variation among strains. As seen by the  
545 overlaid pigmentation categories in Figure 4B, dimension 1 discriminates most strongly  
546 between strains that do and do not produce many backcross progeny with the darkest  
547 pigmentation (categories 7 and 8). Dimension 2, by contrast, discriminates most



548 strongly between strains that do and do not produce many backcross progeny with the  
549 lightest pigmentation (categories 1 and 2) (Figure 4B). The lack of visible clustering for  
550 strains isolated from the same collection site again suggests that flies in the same  
551 population might not be more likely to have similar loci affecting pigmentation than flies  
552 from different populations. Indeed, Euclidean distances in this CA dimension 1 and 2  
553 space were similar for the 110 pairs of strains from the same collection site and the  
554 2440 pairs of strains that were from different collection sites (mean distance for pair  
555 from same collection site = 0.68; mean distance for pairs from different collection sites  
556 = 0.65; t-test, p-value = 0.45).

557

## 558 **Discussion**

559

560 In this study, we tested the hypothesis that *D. novamexicana*-like alleles of *ebony*  
561 and/or *tan* are driving the longitudinal pigmentation cline seen in *D. americana*  
562 (Wittkopp *et al.* 2009; 2011; Cooley *et al.* 2012). We found no support for this  
563 hypothesis: *D. novamexicana*-like alleles of these genes segregating in *D. americana* -  
564 identified based on either sequence or function - were too rare to account for the cline.  
565 Other alleles of *tan* and/or *ebony* might contribute to pigmentation variation within *D.*  
566 *americana*, but we found no statistically significant association between body color and  
567 any of the variable sites in *tan* or *ebony* tested. Rather, genetic analysis indicated that  
568 differences in the number of loci and/or allelic effects of loci affecting pigmentation are  
569 common both within and among populations, suggesting genetic heterogeneity despite  
570 locally adapted pigmentation. Below, we discuss the implications of these findings,  
571 focusing on possible sources of pigmentation variation in *D. americana*, the complexity

572 of its genetic architecture, and how this pigmentation cline might persist in the face of  
573 ongoing gene flow.

574

575 In other *Drosophila* species, differences in body pigmentation segregating within a  
576 species have been shown to be associated with variable sites in pigmentation genes,  
577 including *ebony* (Pool & Aquadro 2007; Takahashi *et al.* 2007; Rebeiz *et al.* 2009;  
578 Telonis-Scott *et al.* 2011; Takahashi & Takano-Shimizu 2011; Bastide *et al.* 2013;  
579 Johnson *et al.* 2015; Miyagi *et al.* 2015; Telonis-Scott & Hoffmann 2018) and *tan*  
580 (Bastide *et al.* 2013; Yassin *et al.* 2016; Endler *et al.* 2016). Despite the lack of  
581 associations observed in the current study, we still think it likely that variation in *ebony*,  
582 *tan*, and/or other pigmentation genes also contribute to pigmentation variation within *D.*  
583 *americana*. We tested for associations between pigmentation and variable sites in  
584 *ebony* and *tan* using ~100 strains each, but larger sample sizes would provide greater  
585 power to detect variants with small effects. In addition, we only tested segregating sites  
586 in the first intron of *tan* and in a region starting in exon 5 and ending in exon 8 for *ebony*.  
587 Because linkage disequilibrium in *D. americana* decays quickly within these genes  
588 (often disappearing within ~50 bp) (Wittkopp *et al.* 2009; 2011), it is unlikely that the  
589 sites tested would detect functional variants outside of these regions; variable sites in  
590 other regions of *tan* and/or *ebony* might be found to be associated with *D. americana*  
591 body color in future studies.

592

593 Association studies can also fail to identify genes contributing to trait variation when  
594 there is genetic heterogeneity (i.e., multiple genotypes giving rise to the same  
595 phenotype) (Korte & Farlow 2013; Manchia *et al.* 2013). Genetic heterogeneity is

596 expected to be more common for polygenic than single-gene traits, but even when there  
597 is only one gene controlling a trait, allelic heterogeneity (multiple alleles with the same  
598 phenotypic effects) can still obscure associations with the gene (Savolainen *et al.* 2013).  
599 Our genetic analysis provides two lines of evidence for such heterogeneity underlying  
600 pigmentation variation in *D. americana*. First, for *tan*, we identified six *D. americana*  
601 alleles showing at least marginal evidence of similarity between *D. americana* and *D.*  
602 *novamexicana*, indicating that they lighten pigmentation more than other *D. americana*  
603 *tan* alleles, but these alleles were derived from five different collection sites in four  
604 different states (Alabama, Arkansas, Indiana, and Missouri) and in only one case were  
605 two of these alleles sampled from the same collection site. This finding suggests that  
606 the similar pigmentation of strains collected from these sites exists despite differences  
607 in the pigmentation alleles they carry. A similar pattern was reported previously for *D.*  
608 *americana* when a *D. novamexicana*-like *ebony* allele causing lighter pigmentation was  
609 found to be present in one of three strains with similar pigmentation derived from  
610 Duncan, Nebraska (Wittkopp *et al.* 2009). Indeed, these *D. novamexicana*-like *tan* and  
611 *ebony* alleles found segregating in *D. americana* provide an excellent example of how  
612 genetic heterogeneity can work: because *ebony* and *tan* encode enzymes catalyzing  
613 opposite directions of a reversible biochemical reaction (True *et al.* 2005), alleles  
614 increasing activity of *ebony* and decreasing activity of *tan* (or vice versa) can have  
615 equivalent effects on pigmentation (Figure 1B, (Wittkopp *et al.* 2009).  
616  
617 Our phenotypic analysis of backcross populations from 51 strains of *D. americana* from  
618 20 collection sites provides the second line of evidence for genetic heterogeneity  
619 underlying clinally varying pigmentation in *D. americana*. In the absence of genetic

620 heterogeneity, two strains derived from the same population with the same phenotype  
621 are expected to carry the same pigmentation alleles. If true, crossing and backcrossing  
622 these strains of *D. americana* to *D. novamexicana* should produce the same  
623 distributions of pigmentation phenotypes. We found, however, that backcross  
624 populations often showed differences in the number of distinct pigmentation classes, the  
625 body color of each pigmentation class, and/or the relative abundance of flies with  
626 different body colors, even when strains were derived from the same collection site.  
627 These data are consistent with genetic heterogeneity in which multiple combinations of  
628 genes and/or alleles underlie similar pigmentation phenotypes within a population as  
629 well as diversity in pigmentation among locations. Similar genetic heterogeneity has  
630 previously been described for mate choice in *Drosophila pseudoobscura* (Barnwell &  
631 Noor 2008), gene expression in yeast (Metzger & Wittkopp 2019), timing of bud set in  
632 Scots pine trees (Kujala *et al.* 2017), flowering time in maize (Buckler *et al.* 2009), and  
633 human diseases (McClellan & King 2010). It has also been reported more broadly for  
634 convergent phenotypes that evolved in more genetically isolated populations, including  
635 adaptation of humans to high-altitudes (Jeong & Di Rienzo 2014), lighter skin color in  
636 East Asian and European peoples (Norton *et al.* 2007), and adaptation to highlands in  
637 maize (Takuno *et al.* 2015). Nonetheless, we think that the extent of genetic  
638 heterogeneity underlying variation in quantitative traits is generally underestimated -  
639 especially within a population or among populations connected by extensive gene flow -  
640 because of the reliance on association mapping for finding loci responsible for trait  
641 variation and the rarity of studies using biparental quantitative trait locus (QTL) mapping  
642 to analyze multiple genotypes from the same population with similar phenotypes.  
643

644 How might this genetic complexity be maintained despite selection favoring a particular  
645 phenotype at a particular location? The extensive gene flow seen throughout *D.*  
646 *americana* (Schäfer *et al.* 2006; Morales-Hojas *et al.* 2008; Wittkopp *et al.* 2011;  
647 Fonseca *et al.* 2013) is likely part of the answer. This gene flow moves alleles among  
648 populations, making it difficult for a population to fix the most adaptive allele for each  
649 local environment (Savolainen *et al.* 2013). But there must also be sufficient genetic  
650 variation affecting pigmentation maintained in the species for this gene flow to cause  
651 genetic heterogeneity (Pritchard *et al.* 2010; Savolainen *et al.* 2013). *D. americana*  
652 harbors high levels of genetic variation generally (Fonseca *et al.* 2013), and selection  
653 for different pigmentation phenotypes in different locations should maintain diverse  
654 pigmentation alleles at the species level (Savolainen *et al.* 2013; Lee *et al.* 2016; Troth  
655 *et al.* 2018). The structure of the biochemical pathway controlling production of  
656 alternative pigments from a single, branched biochemical pathway (Massey & Wittkopp  
657 2016) might also contribute to standing genetic variation because it allows changes in  
658 the activity of multiple genes to have similar effects on pigmentation (Wittkopp *et al.*  
659 2009). Ultimately, however, selection acting on this standing genetic variation must be  
660 favoring different pigmentation phenotypes in different locations to maintain the cline  
661 (Kawecki & Ebert 2004; Savolainen *et al.* 2013). Assortative mating, in which individuals  
662 with similar body color are more likely to mate with each other than individuals with  
663 different body color, could also contribute to the *D. americana* pigmentation cline.  
664 Although evidence of assortative mating for body color is rare in *Drosophila* species, it  
665 has been observed in an Indian population of *D. melanogaster*, with darker individuals  
666 more likely to mate with each other in cold, dry weather and lighter individuals more  
667 likely to mate with each other when it is hot or humid (Dev *et al.* 2013). Disentangling

668 the relative contributions of these different evolutionary and molecular processes to the  
669 formation and maintenance of the *D. americana* body color cline will require much more  
670 extensive, interdisciplinary studies.

671

672

## 673 **Acknowledgements**

674

675 We thank Bryant McAllister for sharing strains of *D. americana* that his lab established  
676 from field collections, the Drosophila Species Stock Center for maintaining and  
677 supplying strains of *D. novamexicana* and *D. americana*, and members of the Wittkopp  
678 lab (especially Henry Ertl, Mark Hill, Petra Vande Zande, Abigail Lamb and Molly Hirst)  
679 for helpful discussions and feed-back on this work. Funding for this project was provided  
680 by the National Institutes of Health (F32GM087928 to AC; R35GM118073 and  
681 R01GM08973 to PJW) and the National Science Foundation (DEB-0640485 to PJW).

682

## 683 **References**

684

- 685 Adrion JR, Hahn MW, Cooper BS (2015) Revisiting classic clines in *Drosophila*  
686 *melanogaster* in the age of genomics. *Trends in Genetics*, **31**, 434–444.
- 687 Ahmadian A, Lundeberg J, Nyrén P, Uhlén M, Ronaghi M (2000) Analysis of the *p53*  
688 tumor suppressor gene by pyrosequencing. *BioTechniques*, **28**, 140–147.
- 689 Ahmed-Braimah YH, McAllister BF (2012) Rapid Evolution of Assortative Fertilization  
690 between Recently Allopatric Species of *Drosophila*. *International Journal of*  
691 *Evolutionary Biology*, **2012**, 285468–9.
- 692 Bandelt HJ, Forster P, Röhl A (1999) Median-joining networks for inferring intraspecific  
693 phylogenies. *Molecular Biology and Evolution*, **16**, 37–48.
- 694 Barnwell CV, Noor MAF (2008) Failure to Replicate Two Mate Preference QTLs across  
695 Multiple Strains of *Drosophila pseudoobscura*. *The Journal of Heredity*, **99**, 653–  
696 656.
- 697 Bastide H, Betancourt A, Nolte V *et al.* (2013) A genome-wide, fine-scale map of natural  
698 pigmentation variation in *Drosophila melanogaster*. *PLoS Genetics*, **9**, e1003534.

- 699 Bastide H, Yassin A, Johanning EJ, Pool JE (2014) Pigmentation in *Drosophila*  
700 *melanogaster* reaches its maximum in Ethiopia and correlates most strongly with  
701 ultra-violet radiation in sub-Saharan Africa. *BMC Evolutionary Biology*, **14**, 179.
- 702 Benjamini, Y., & Hochberg, Y. (1995). Controlling the false discovery rate: a practical  
703 and powerful approach to multiple testing. *Journal of the Royal Statistical Society*  
704 *Series B*, 57(1), 289–300.
- 705 Brisson JA, De Toni DC, Duncan I, Templeton AR (2005) Abdominal pigmentation  
706 variation in *Drosophila polymorpha*: geographic variation in the trait, and underlying  
707 phylogeography. *Evolution*, **59**, 1046–1059.
- 708 Buckler ES, Holland JB, Bradbury PJ *et al.* (2009) The Genetic Architecture of Maize  
709 Flowering Time. *Science*, **325**, 714–718.
- 710 Caletka BC, McAllister BF (2004) A genealogical view of chromosomal evolution and  
711 species delimitation in the *Drosophila virilis* species subgroup. *Molecular*  
712 *Phylogenetics and Evolution*, **33**, 664–670.
- 713 Clusella-Trullas S, Terblanche JS (2011) Local adaptation for body color in *Drosophila*  
714 *americana*: commentary on Wittkopp *et al.* *Heredity*, **106**, 904–905.
- 715 Cooley AM, Shefner L, McLaughlin WN, Stewart EE, Wittkopp PJ (2012) The ontogeny  
716 of color: developmental origins of divergent pigmentation in *Drosophila americana*  
717 and *D. novamexicana*. *Evolution & Development*, **14**, 317–325.
- 718 David JR, Capy P (1988) Genetic variation of *Drosophila melanogaster* natural  
719 populations. *Trends in Genetics*, **4**, 106–111.
- 720 David, J. R., Capy, P., Payant, V., & Tsakas, S. (1985). Thoracic trident pigmentation in  
721 *Drosophila melanogaster*: differentiation of geographical populations. *Genet Sel*  
722 *Evol*, **17**, 211–224.
- 723 Davis JS, Moyle LC (2019) Desiccation resistance and pigmentation variation reflects  
724 bioclimatic differences in the *Drosophila americana* species complex. *BMC*  
725 *Evolutionary Biology*, **19**, 204–14.
- 726 Dev K, Chahal J, Parkash R (2013) Seasonal variations in the mating-related traits of  
727 *Drosophila melanogaster*. *Journal of Ethology*, **31**, 165–174.
- 728 Endler JA (1977) *Geographic Variation, Speciation and Clines*. Princeton University  
729 Press, Princeton, NJ.
- 730 Endler L, Betancourt AJ, Nolte V, Schlötterer C (2016) Reconciling Differences in Pool-  
731 GWAS Between Populations: A Case Study of Female Abdominal Pigmentation in  
732 *Drosophila melanogaster*. *Genetics*, **202**, 843–855.
- 733 Felsenstein J (1985) Confidence Limits on Phylogenies: an Approach Using the  
734 Bootstrap. *Evolution*, **39**, 783–791.
- 735 Fonseca NA, Morales-Hojas R, Reis M *et al.* (2013) *Drosophila americana* as a model  
736 species for comparative studies on the molecular basis of phenotypic variation.  
737 *Genome Biology and Evolution*, **5**, 661–679.
- 738 Fournier-Level A, Korte A, Cooper MD *et al.* (2011) A Map of Local Adaptation in  
739 *Arabidopsis thaliana*. *Science*, **334**, 86–89.
- 740 François O, Martins H, Caye K, Schoville SD (2016) Controlling false discoveries in  
741 genome scans for selection. *Molecular Ecology*, **25**, 454–469.
- 742 Gloor GB, Preston CR, Johnson-Schlitz DM *et al.* (1993) Type I repressors of P element  
743 mobility. *Genetics*, **135**, 81–95.

- 744 Haasl RJ, Payseur BA (2016) Fifteen years of genomewide scans for selection: trends,  
745 lessons and unaddressed genetic sources of complication. *Molecular Ecology*, **25**,  
746 5–23.
- 747 Hancock AM, Brachi B, Faure N *et al.* (2011) Adaptation to Climate Across the  
748 *Arabidopsis thaliana* Genome. *Science*, **334**, 83–86.
- 749 Hollocher H, Hatcher JL, Dyreson EG (2000) Evolution of abdominal pigmentation  
750 differences across species in the *Drosophila dunnii* subgroup. *Evolution*, **54**, 2046–  
751 2056.
- 752 Huxley J (1938) Clines: an auxiliary taxonomic principle. *Nature*, **142**, 219–220.
- 753 Jeong C, Di Rienzo A (2014) Adaptations to local environments in modern human  
754 populations. *Current Opinion in Genetics & Development*, **29**, 1–8.
- 755 Johnson WC, Ordway AJ, Watada M *et al.* (2015) Genetic Changes to a Transcriptional  
756 Silencer Element Confers Phenotypic Diversity within and between *Drosophila*  
757 Species. *PLoS Genetics*, **11**, e1005279.
- 758 Kawecki TJ, Ebert D (2004) Conceptual issues in local adaptation. *Ecology Letters*, **7**,  
759 1225–1241.
- 760 Korte A, Farlow A (2013) The advantages and limitations of trait analysis with GWAS: a  
761 review. *Plant Methods*, **9**, 29.
- 762 Kujala ST, Knürr T, Kärkkäinen K *et al.* (2017) Genetic heterogeneity underlying  
763 variation in a locally adaptive clinal trait in *Pinus sylvestris* revealed by a Bayesian  
764 multipopulation analysis. *Heredity*, **118**, 413–423.
- 765 Kumar S, Stecher G, Tamura K (2016) MEGA7: Molecular Evolutionary Genetics  
766 Analysis Version 7.0 for Bigger Datasets. *Molecular Biology and Evolution*, **33**,  
767 1870–1874.
- 768 Lamb AM, Wang Z, Simmer P, Chung H, Wittkopp PJ (2020) *ebony* affects  
769 pigmentation divergence and cuticular hydrocarbons in *Drosophila americana* and  
770 *D. novamexicana*. *bioRxiv*, **57**, 2020.03.05.977009.
- 771 Lê, S., Josse, J., & Husson, F. (2008). FactoMineR: An RPackage for Multivariate  
772 Analysis. *Journal of Statistical Software*, **25**(1), 1–18.
- 773 Lee YW, Fishman L, Kelly JK, Willis JH (2016) A Segregating Inversion Generates  
774 Fitness Variation in Yellow Monkeyflower (*Mimulus guttatus*). *Genetics*, **202**, 1473–  
775 1484.
- 776 Lotterhos KE, Whitlock MC (2015) The relative power of genome scans to detect local  
777 adaptation depends on sampling design and statistical method. *Molecular Ecology*,  
778 **24**, 1031–1046.
- 779 Manchia M, Cullis J, Turecki G *et al.* (2013) The Impact of Phenotypic and Genetic  
780 Heterogeneity on Results of Genome Wide Association Studies of Complex  
781 Diseases. *PLoS ONE*, **8**, e76295.
- 782 Marjoram P, Zubair A, Nuzhdin SV (2013) Post-GWAS: where next? More samples,  
783 more SNPs or more biology? *Heredity*, **112**, 79–88.
- 784 Massey JH, Wittkopp PJ (2016) The Genetic Basis of Pigmentation Differences Within  
785 and Between *Drosophila* Species. *Current Topics in Developmental Biology*, **119**,  
786 27–61.
- 787 Matute DR, Harris A (2013) The influence of abdominal pigmentation on desiccation  
788 and ultraviolet resistance in two species of *Drosophila*. *Evolution*, **67**, 2451–2460.



- 789 McAllister, B. F., Sheeley, S. L., Mena, P. A., Evans, A. L., & Schlötterer, C. (2008).  
790 Clinal distribution of a chromosomal rearrangement: a precursor to chromosomal  
791 speciation? *Evolution*, *62*(8), 1852–1865.
- 792 McClellan J, King M-C (2010) Genetic heterogeneity in human disease. *Cell*, **141**, 210–  
793 217.
- 794 Metzger BPH, Wittkopp PJ (2019) Compensatory *trans*-regulatory alleles minimizing  
795 variation in *TDH3* expression are common within *Saccharomyces cerevisiae*.  
796 *Evolution letters*, **3**, 448–461.
- 797 Miyagi R, Akiyama N, Osada N, Takahashi A (2015) Complex patterns of *cis*-regulatory  
798 polymorphisms in *ebony* underlie standing pigmentation variation in *Drosophila*  
799 *melanogaster*. *Molecular Ecology*, **24**, 5829–5841.
- 800 Morales-Hojas R, Vieira CP, Vieira J (2008) Inferring the evolutionary history of  
801 *Drosophila americana* and *Drosophila novamexicana* using a multilocus approach  
802 and the influence of chromosomal rearrangements in single gene analyses.  
803 *Molecular Ecology*, **17**, 2910–2926.
- 804 Norton HL, Kittles RA, Parra E *et al.* (2007) Genetic evidence for the convergent  
805 evolution of light skin in Europeans and East Asians. *Molecular Biology and*  
806 *Evolution*, **24**, 710–722.
- 807 Orsini L, Huttunen S, Schlötterer C (2004) A multilocus microsatellite phylogeny of the  
808 *Drosophila virilis* group. *Heredity*, **93**, 161–165.
- 809 Parkash R, Aggarwal DD, Ranga P, Singh D (2012) Divergent strategies for adaptation  
810 to desiccation stress in two *Drosophila* species of immigrans group. *Journal of*  
811 *comparative physiology. B, Biochemical, systemic, and environmental physiology*,  
812 **182**, 751–769.
- 813 Pool JE, Aquadro CF (2007) The genetic basis of adaptive pigmentation variation in  
814 *Drosophila melanogaster*. *Molecular Ecology*, **16**, 2844–2851.
- 815 Pritchard JK, Di Rienzo A (2010) Adaptation – not by sweeps alone. *Nature Reviews*  
816 *Genetics*, **11**, 665–667.
- 817 Pritchard JK, Pickrell JK, Coop G (2010) The Genetics of Human Adaptation: Hard  
818 Sweeps, Soft Sweeps, and Polygenic Adaptation. *Current Biology*, **20**, R208–R215.
- 819 Rajpurohit S, Schmidt PS (2019) Latitudinal Pigmentation Variation Contradicts  
820 Ultraviolet Radiation Exposure: A Case Study in Tropical Indian *Drosophila*  
821 *melanogaster*. *Frontiers in physiology*, **10**, 84.
- 822 Rajpurohit S, Parkash R, Ramniwas S (2008) Body melanization and its adaptive role in  
823 thermoregulation and tolerance against desiccating conditions in drosophilids.  
824 *Entomological Research*, **38**, 49–60.
- 825 Rebeiz M, Pool JE, Kassner VA, Aquadro CF, Carroll SB (2009) Stepwise modification  
826 of a modular enhancer underlies adaptation in a *Drosophila* population. *Science*,  
827 **326**, 1663–1667.
- 828 Savolainen O, Lascoux M, Merilä J (2013) Ecological genomics of local adaptation.  
829 *Nature Reviews Genetics*, **14**, 807–820.
- 830 Schäfer MA, Orsini L, McAllister BF, Schlötterer C (2006) Patterns of microsatellite  
831 variation through a transition zone of a chromosomal cline in *Drosophila americana*.  
832 *Heredity*, **97**, 291–295.
- 833 Sheeley SL, McAllister BF (2008) Patterns of natural selection at the *Alcohol*  
834 *dehydrogenase* gene of *Drosophila americana*. *Fly*, **2**, 243–246.

- 835 Sillero N, Reis M, Vieira CP, Vieira J, Morales-Hojas R (2014) Niche evolution and  
836 thermal adaptation in the temperate species *Drosophila americana*. *Journal of*  
837 *Evolutionary Biology*, **27**, 1549–1561.
- 838 Stinchcombe JR, Hoekstra HE (2007) Combining population genomics and quantitative  
839 genetics: finding the genes underlying ecologically important traits. *Heredity*, **100**,  
840 158–170.
- 841 Takahashi A, Takano-Shimizu T (2011) Divergent enhancer haplotype of *ebony* on  
842 inversion In(3R)Payne associated with pigmentation variation in a tropical  
843 population of *Drosophila melanogaster*. *Molecular Ecology*, **20**, 4277–4287.
- 844 Takahashi A, Takahashi K, Ueda R, Takano-Shimizu T (2007) Natural variation of  
845 *ebony* gene controlling thoracic pigmentation in *Drosophila melanogaster*. *Genetics*,  
846 **177**, 1233–1237.
- 847 Takuno S, Ralph P, Swarts K *et al.* (2015) Independent Molecular Basis of Convergent  
848 Highland Adaptation in Maize. *Genetics*, **200**, 1297–1312.
- 849 Tamura K, Nei M (1993) Estimation of the number of nucleotide substitutions in the  
850 control region of mitochondrial DNA in humans and chimpanzees. *Molecular Biology*  
851 *and Evolution*, **10**, 512–526.
- 852 Telonis-Scott M, Hoffmann AA (2018) Enhancing Ebony? Common Associations With a  
853 *cis*-Regulatory Haplotype for *Drosophila melanogaster* Thoracic Pigmentation in a  
854 Japanese Population and Australian Populations. *Frontiers in physiology*, **9**, 822.
- 855 Telonis-Scott M, Hoffmann AA, Sgro CM (2011) The molecular genetics of clinal  
856 variation: a case study of *ebony* and thoracic trident pigmentation in *Drosophila*  
857 *melanogaster* from eastern Australia. *Molecular Ecology*, **20**, 2100–2110.
- 858 Thompson JD, Higgins DG, Gibson TJ (1994) CLUSTAL W: improving the sensitivity of  
859 progressive multiple sequence alignment through sequence weighting, position-  
860 specific gap penalties and weight matrix choice. *Nucleic Acids Research*, **22**, 4673–  
861 4680.
- 862 Troth A, Puzey JR, Kim RS, Willis JH, Kelly JK (2018) Selective trade-offs maintain  
863 alleles underpinning complex trait variation in plants. *Science*, **361**, 475–478.
- 864 True JR (2003) Insect melanism: the molecules matter. *Trends in Ecology & Evolution*,  
865 **18**, 640–647.
- 866 True JR, Yeh S-D, Hovemann BT *et al.* (2005) *Drosophila tan* encodes a novel  
867 hydrolase required in pigmentation and vision. *PLoS Genetics*, **1**, e63.
- 868 Wittkopp PJ, Beldade P (2009) Development and evolution of insect pigmentation:  
869 genetic mechanisms and the potential consequences of pleiotropy. *Seminars in Cell*  
870 *& Developmental Biology*, **20**, 65–71.
- 871 Wittkopp PJ, Haerum BK, Clark AG (2004) Evolutionary changes in *cis* and *trans* gene  
872 regulation. *Nature*, **430**, 85–88.
- 873 Wittkopp PJ, Haerum BK, Clark AG (2008) Regulatory changes underlying expression  
874 differences within and between *Drosophila* species. *Nature Genetics*, **40**, 346–350.
- 875 Wittkopp PJ, Smith-Winberry G, Arnold LL *et al.* (2011) Local adaptation for body color  
876 in *Drosophila americana*. *Heredity*, **106**, 592–602.
- 877 Wittkopp PJ, Stewart EE, Arnold LL *et al.* (2009) Intraspecific polymorphism to  
878 interspecific divergence: genetics of pigmentation in *Drosophila*. *Science*, **326**, 540–  
879 544.

880 Wittkopp PJ, Williams BL, Selegue JE, Carroll SB (2003) *Drosophila* pigmentation  
881 evolution: divergent genotypes underlying convergent phenotypes. *Proc. Natl. Acad.*  
882 *Sci. U.S.A.*, **100**, 1808–1813.  
883 Yassin A, Bastide H, Chung H *et al.* (2016) Ancient balancing selection at *tan* underlies  
884 female colour dimorphism in *Drosophila erecta*. *Nature communications*, **7**, 10400.  
885

## 886 **Data Accessibility**

887 Sequences described in Supplementary Files 1 and 2 are also available in NCBI  
888 PopSet with GenBank accession numbers: MT350927 - MT351036 for *ebony* and  
889 MT350824 - MT350926 for *tan*. All other data and code are included in the manuscript  
890 as supplementary tables and files.

891

## 892 **Author Contributions**

893 PJW and LLS designed the research. LLS and WNM quantified pigmentation and  
894 performed the genetic analysis. AMC, DCY, AJ, and PJW collected and analyzed  
895 sequence data. PJW performed the statistical analysis and constructed figures, with  
896 assistance from LLS and WNM. PJW wrote the paper, with input from LLS, WNM, and  
897 AJ and final editing by all authors.

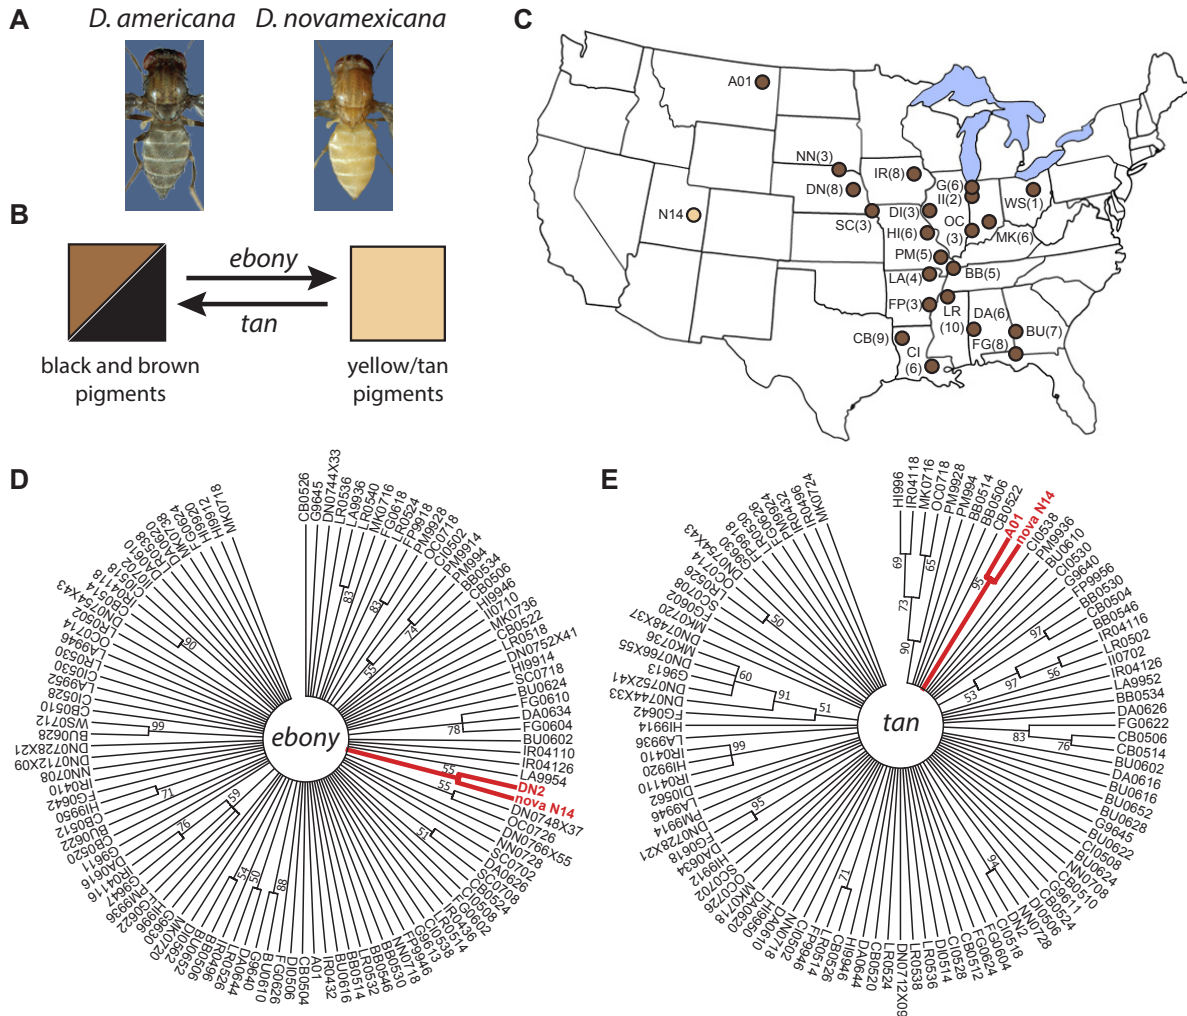

**Figure 1. *D. americana* alleles of *ebony* and *tan* closely related to the *D. novamexicana* allele are rare within *D. americana*.** (A) *D. americana* (left) has a much darker body color than *D. novamexicana* (right). (B) The *tan* and *ebony* genes encode enzymes that catalyze a reversible biochemical reaction required for the production of dark (black and brown) melanins and light (yellow/tan) sclerotins, respectively. (C) Collection sites for progenitors of *D. americana* (brown) and *D. novamexicana* (yellow) strains used in this work are shown. Numbers in parentheses indicate the number of independently isolated strains examined from that site. Only a single strain from the Drosophila Species Stock Center was examined for A01 and N14. For more information about these strains, see Supplementary Table 1. (D, E) The circular phylogenetic trees shown for *ebony* (D) and *tan* (E) were produced using a Maximum Likelihood method implemented in MEGA7, as described in Methods. Branches shown were supported by 50% or more of bootstrap replicate trees. The *ebony* tree is based on 579 aligned sites from 110 alleles, and the *tan* tree is based on 1328 aligned sites from 103 alleles. Branches shown in red highlight the *D. novamexicana* allele (“nova N14”) and the allele from *D. americana* (DN2 for *ebony*, A01 for *tan*) previously shown to share similarity in both sequence and function with the *D. novamexicana* allele (Wittkopp *et al.* 2009).

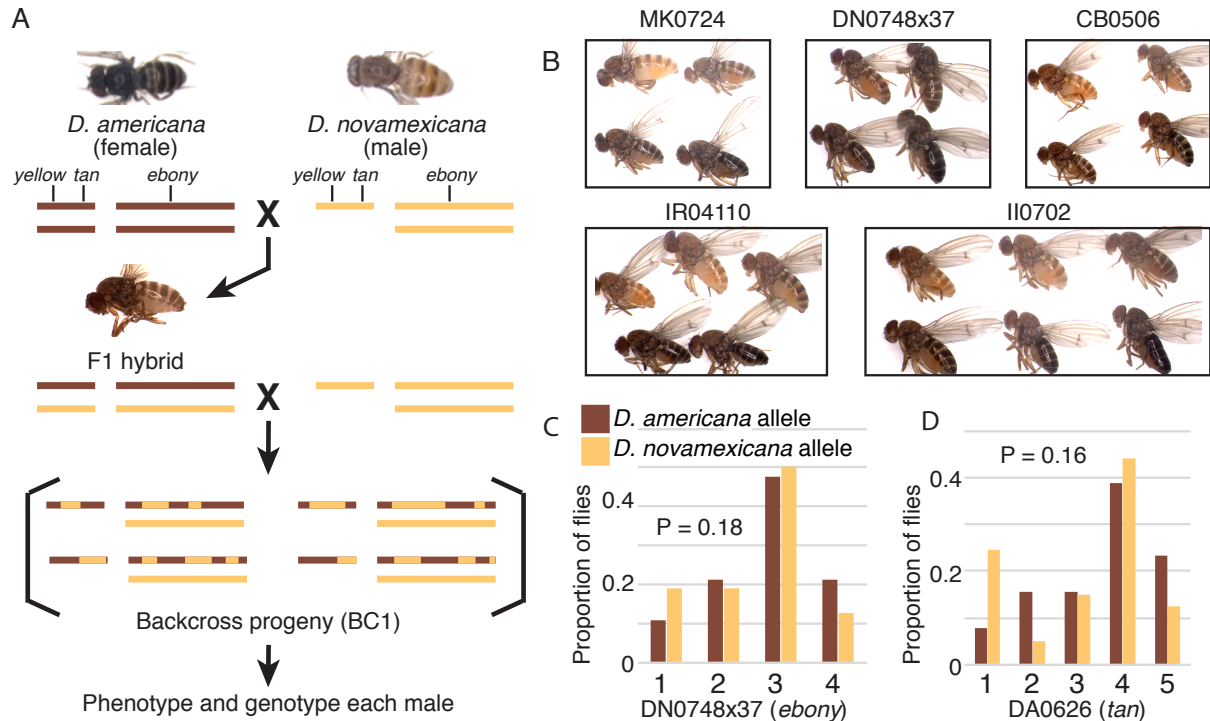

**Figure 2. Genetic analysis of pigmentation differences between *D. novamexicana* and strains of *D. americana*.** (A) Schematics show chromosomal content of *D. americana* and *D. novamexicana* parental strains, F<sub>1</sub> hybrids, and examples of potential backcross progeny produced by crossing an F<sub>1</sub> hybrid female back to *D. novamexicana*, with all autosomes represented as a single bar. Approximate locations of the *yellow* and *tan* genes on the X chromosome (Muller Element A) as well as the *ebony* gene on chromosome 2 (Muller element E) are also shown. Dorsal images of *D. novamexicana* (strain N14) and *D. americana* (strain CB0522) as well as the lateral image of a F<sub>1</sub> hybrid shown were taken at different times from each other and images shown in panel B. Color adjustments have been made to reproduce relative pigmentation of these three genotypes, but these images should not be quantitatively compared to each other or images in panel B. (B) Representative flies from each of the 4 to 6 pigmentation classes identified for five strains of *D. americana* are shown, arranged from lightest (top left) to darkest (bottom right) in each box. A lateral view is shown for all flies and images within a box were collected under comparable conditions. (C, D) The proportion of male backcross flies in each pigmentation class carrying a *D. americana* (brown) or *D. novamexicana* (yellow) allele of *ebony* (C) or *tan* (D) inherited from their F<sub>1</sub> hybrid mother is shown for backcrosses with two strains of *D. americana*: DN0748x37 (C) and DA0626 (D). These two examples are the only cases where no statistically significant difference in body color was detected for flies inheriting the *D. americana* or *D. novamexicana* alleles of *ebony* or *tan*. Phenotypic distributions are shown for *yellow*, *ebony*, and *tan* genotypes for all strains of *D. americana* in Supplementary Figures 3, 4 and 5, respectively. Note that borderline evidence of functional similarity for *tan* alleles was also observed between *D. novamexicana* and five other strains of *D. americana* (Supplementary Figure 5). None of the *D. americana* strains showed evidence of functional differences from *D.*

*novamexicana* for alleles of the *yellow* gene (Supplementary Figure 3). Genotyping data for all three genes is provided as Supplementary Table 4, and results of the statistical tests are provided as Supplementary Table 5.

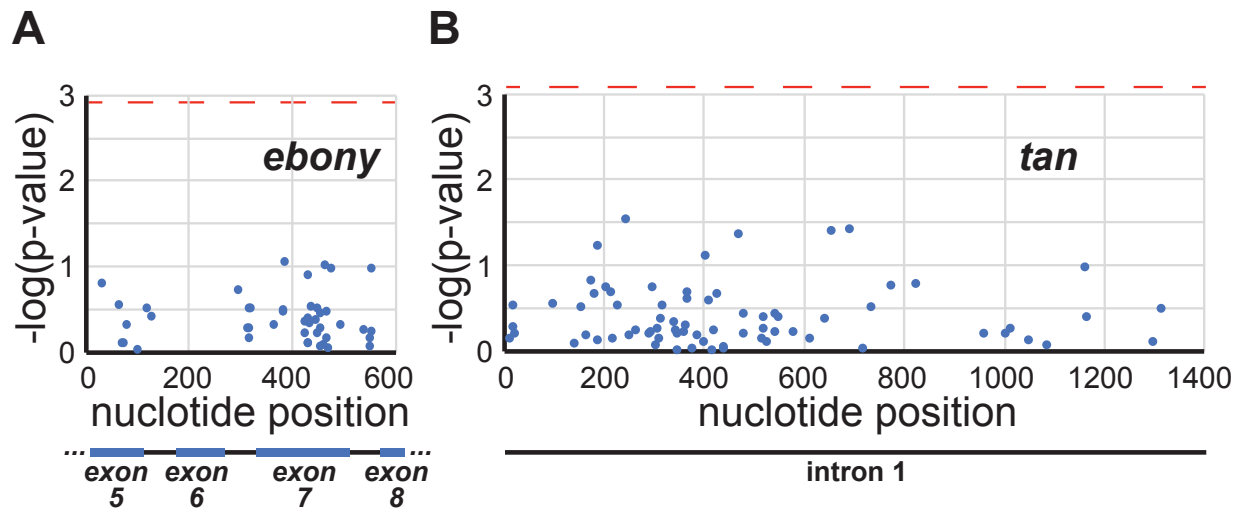

**Figure 3. Variable sites sampled in *tan* and *ebony* are not significantly associated with pigmentation in *D. americana*.** Statistical significance of an association between body color and the nucleotide present at variable sites in the *D. americana* *ebony* (A) and *tan* (B) regions sequenced are shown, reported as  $-\log(\text{p-value})$  from the general linear model described in Methods. Red dotted lines show threshold used to assess statistical significance. Schematics shown below each plot indicate the location of intronic and exons regions in the *ebony* (A) and *tan* (B) sequences analyzed. Body color data used provided as Supplementary Table 2. Genotype data used provided as Supplementary Table 6 for *tan* and Supplementary Table 7 for *ebony*. Results of the general linear models are provided as Supplementary Table 8.

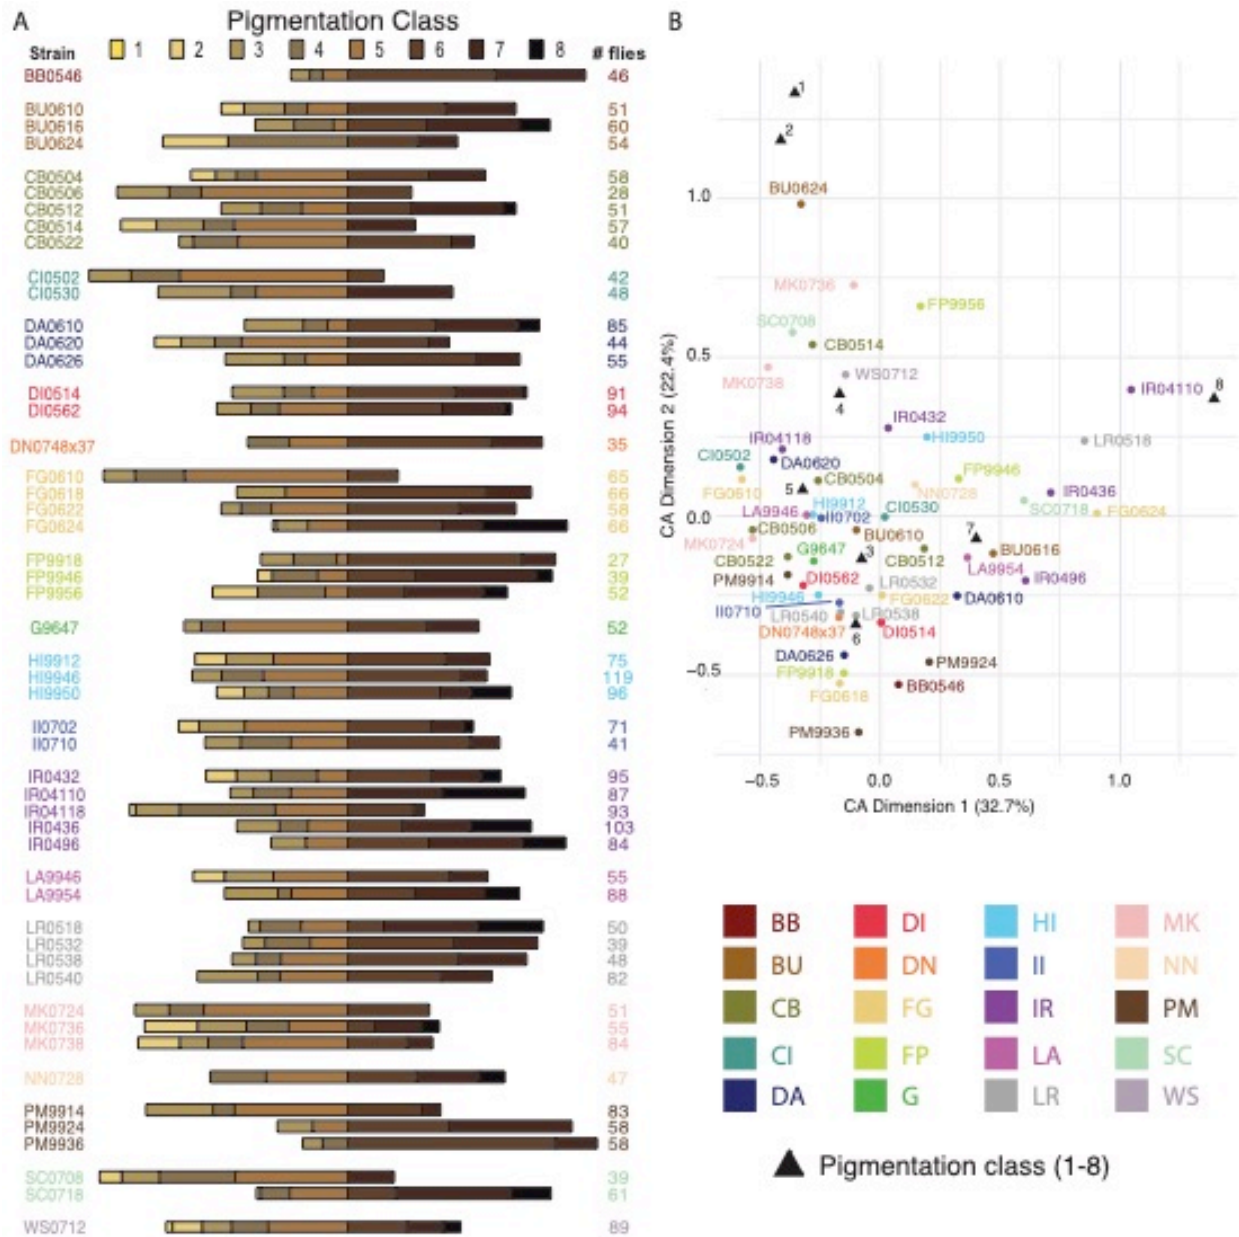

**Figure 4. Distributions of backcross phenotypes indicate diversity in number and effects of loci affecting pigmentation.** (A) The relative proportion of male backcross progeny in each of eight standardized pigmentation classes (Supplementary Table 3) is shown for each *D. americana* strain. Pigmentation classes are indicated by the color of the bar ranging from the lightest (yellow, class 1) to the darkest (black, class 8), with a longer bar indicating a greater proportion of the backcross population. Bars are aligned vertically at the transition between pigmentation classes 5 and 6. Strains are clustered by collection site, with each strain derived from the same collection site shown in the same color. The total number of male backcross progeny scored for each strain is shown to the right of each distribution. Note the differences in distributions not only between, but also within, collection sites. For example, strains producing very different distributions of backcross progeny were isolated from the FG,

IR, and SC collection sites. (B) Results from a correspondence analysis (CA) used to compare the distribution of backcross pigmentation phenotypes among strains are shown, plotted with colored circles according to their values on the first two axes of variation: CA dimension 1, which explained 32.7% of the variation and CA dimension 2, which explained 22.4% of the variation. Strains shown with the same color were derived from the same collection site. The relative placement of pigmentation classes 1 - 8 on these two axes is also shown with black triangles for comparison. Note that, for example, strain IR4110, which had most backcross progeny with the darkest body color is located close to the triangle representing the darkest pigmentation class (class 8). Similarly, BU0624, the strain that produced the most lightly pigmented backcross progeny, is located close to the triangles representing the lightest pigmentation classes (class 1 and 2). The lack of visual clustering for strains derived from the same collection site is consistent with our statistical test showing strains from the same collection site were no more likely to be located close to each other in this CA space than strains from different collection sites.



## Supplemental Information for:

### Genetic architecture of clinal body color variation in *Drosophila americana*

Lisa L. Sramkoski\*, Wesley N. McLaughlin\*, Arielle M. Cooley, David C. Yuan, Alisha John, and  
Patricia J. Wittkopp

#### Table of Contents:

|                                        |        |
|----------------------------------------|--------|
| <b>Supplementary Figure 1</b>          | Page 2 |
| <b>Supplementary Figure 2</b>          | Page 3 |
| <b>Supplementary Figure 3</b>          | Page 4 |
| <b>Supplementary Figure 4</b>          | Page 5 |
| <b>Supplementary Figure 5</b>          | Page 6 |
| <b>Summary of Supplementary Tables</b> | Page 7 |
| <b>Summary of Supplementary Files</b>  | Page 7 |

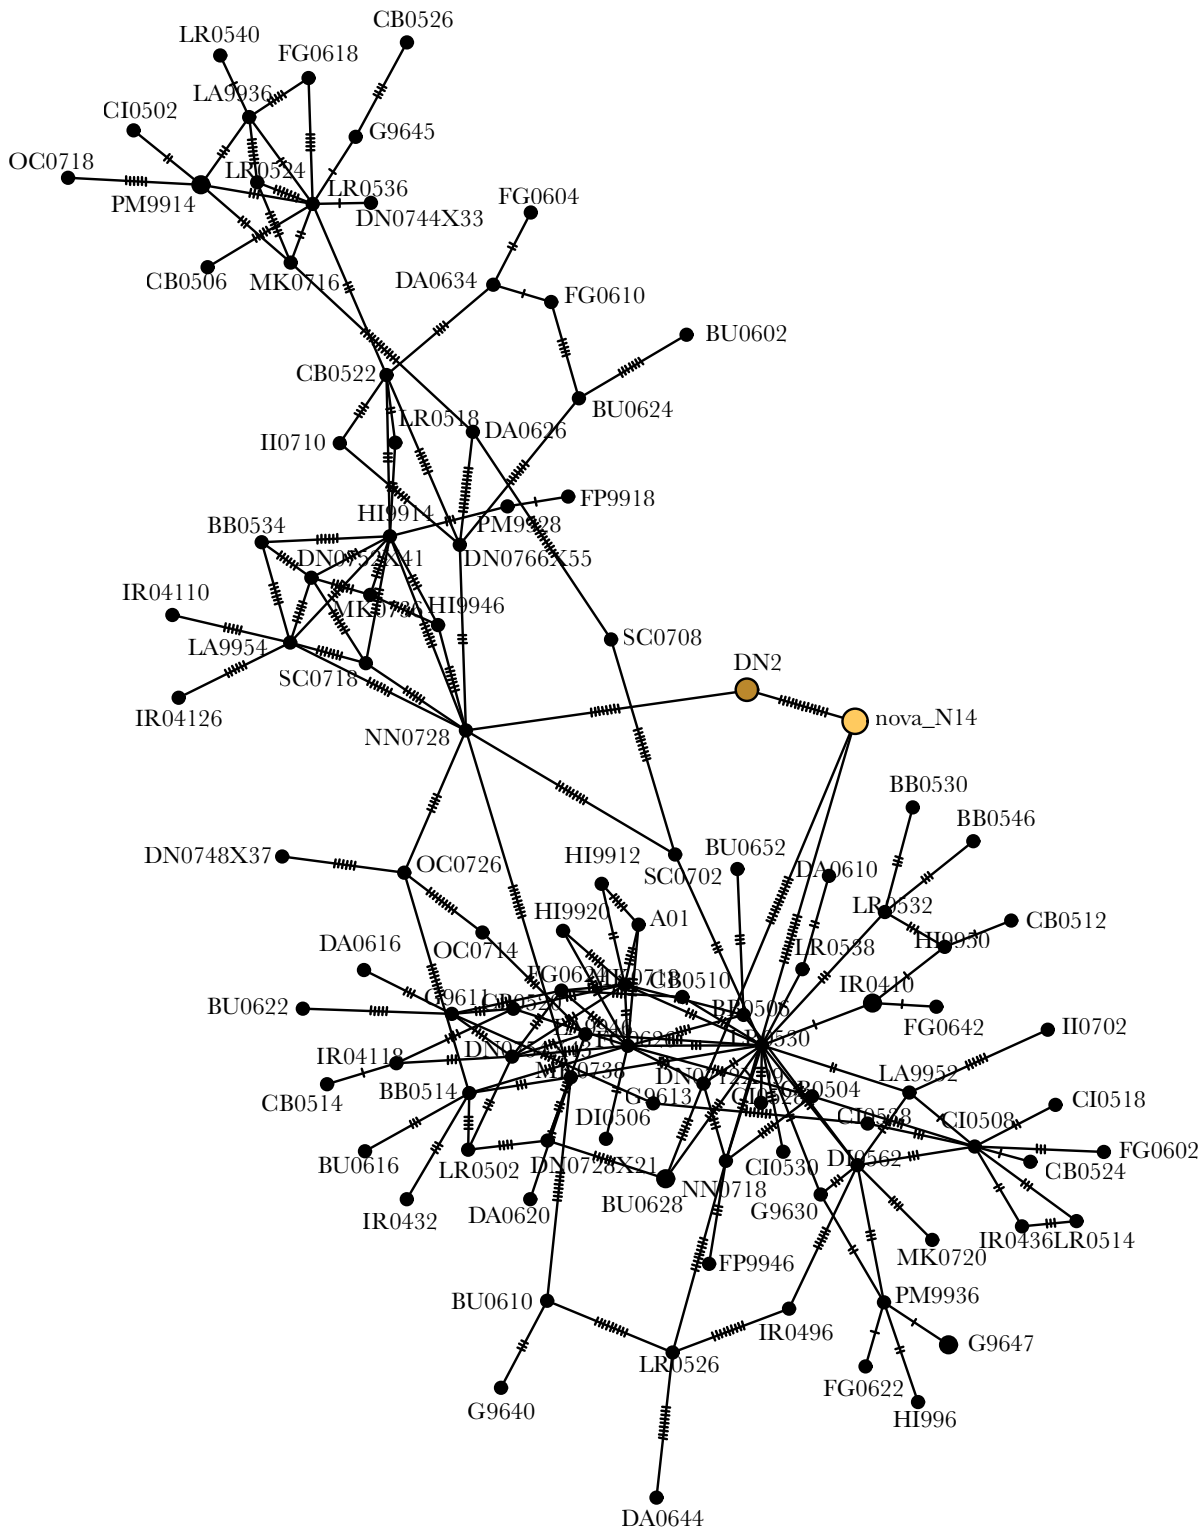

**Supplementary Figure 1. Haplotype network for *ebony*.** A Median Spanning Network built from the same *ebony* sequences used to construct the phylogenetic tree shown in Figure 1D is shown. Note that the DN2 allele from *D. americana* previously shown to share similarity in sequence and function with *D. novamexicana* (brown) is most similar to the *D. novamexicana* (“nova\_N14”) allele (yellow).

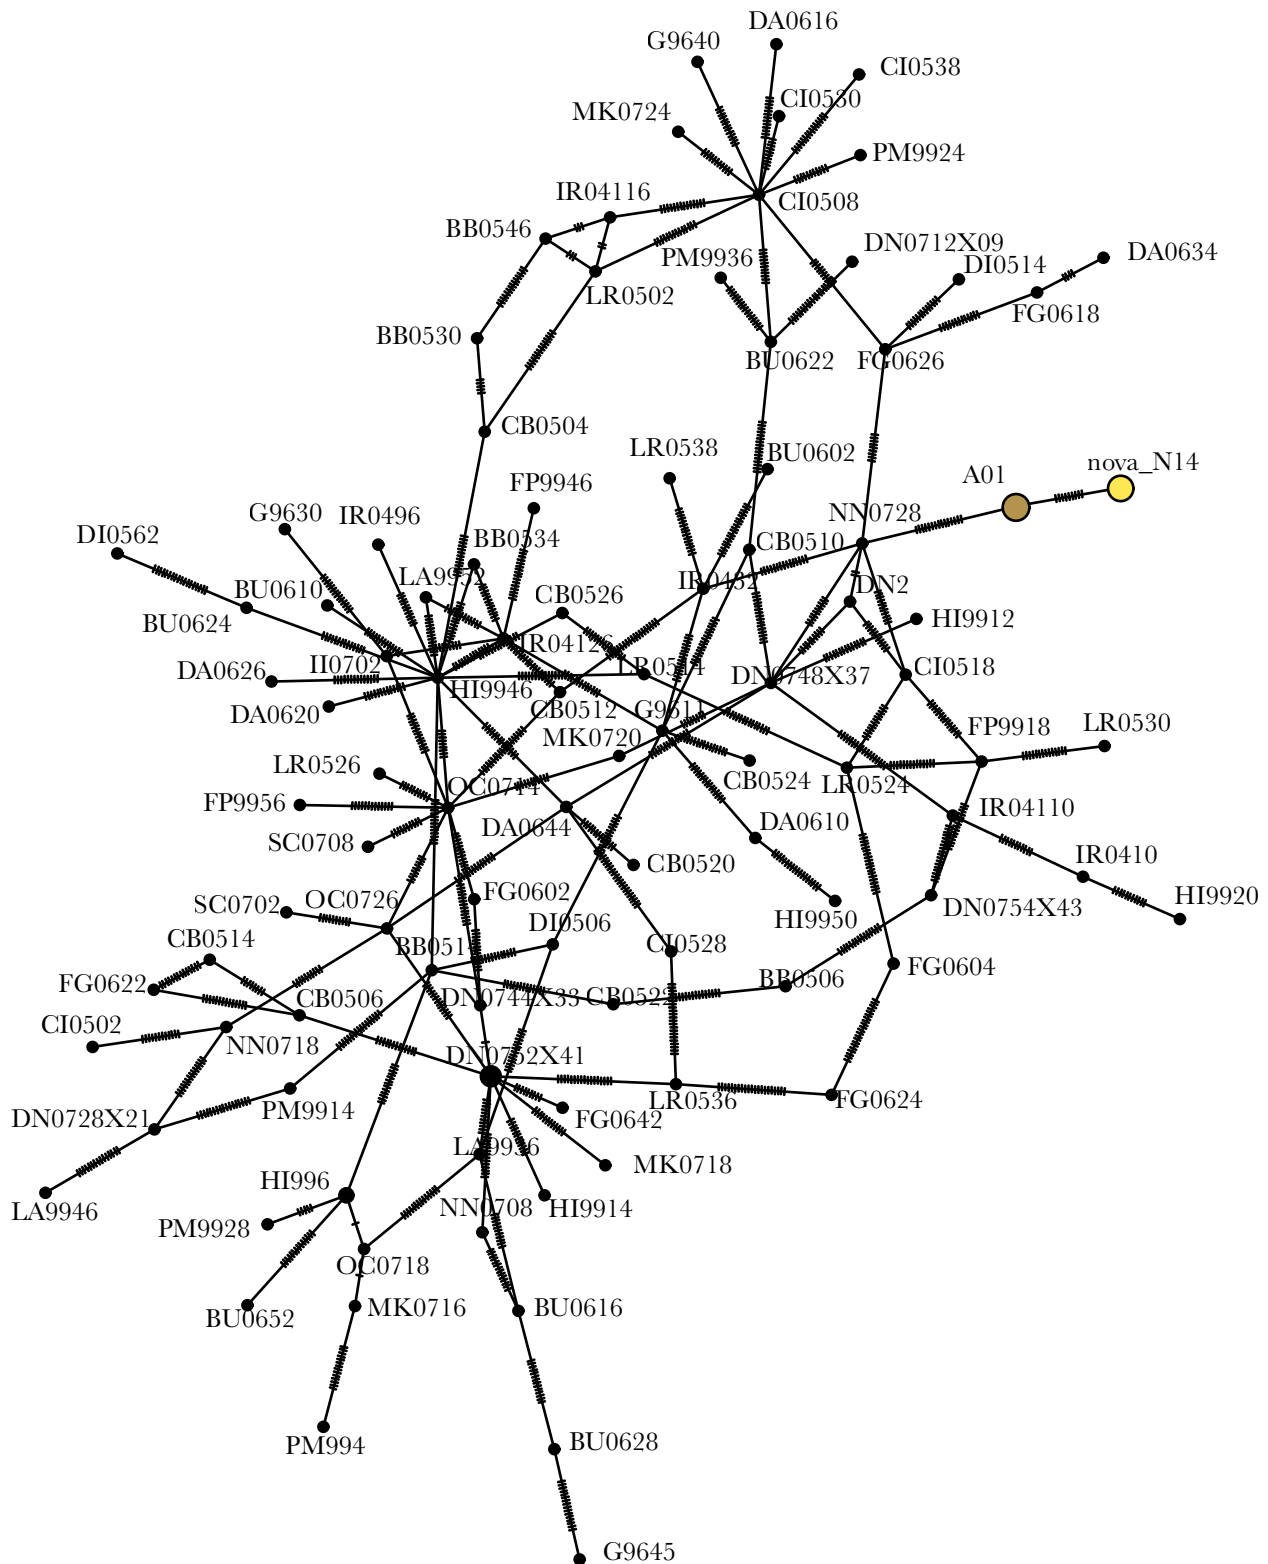

**Supplementary Figure 2. Haplotype network for *tan*.** A Median Spanning Network built from the same *tan* sequences used to construct the phylogenetic tree shown in Figure 1E is shown. Note that the A01 allele from *D. americana* previously shown to share similarity in sequence and function with *D. novamexicana* (brown) is most similar to the *D. novamexicana* (“nova\_N14”) allele (yellow).

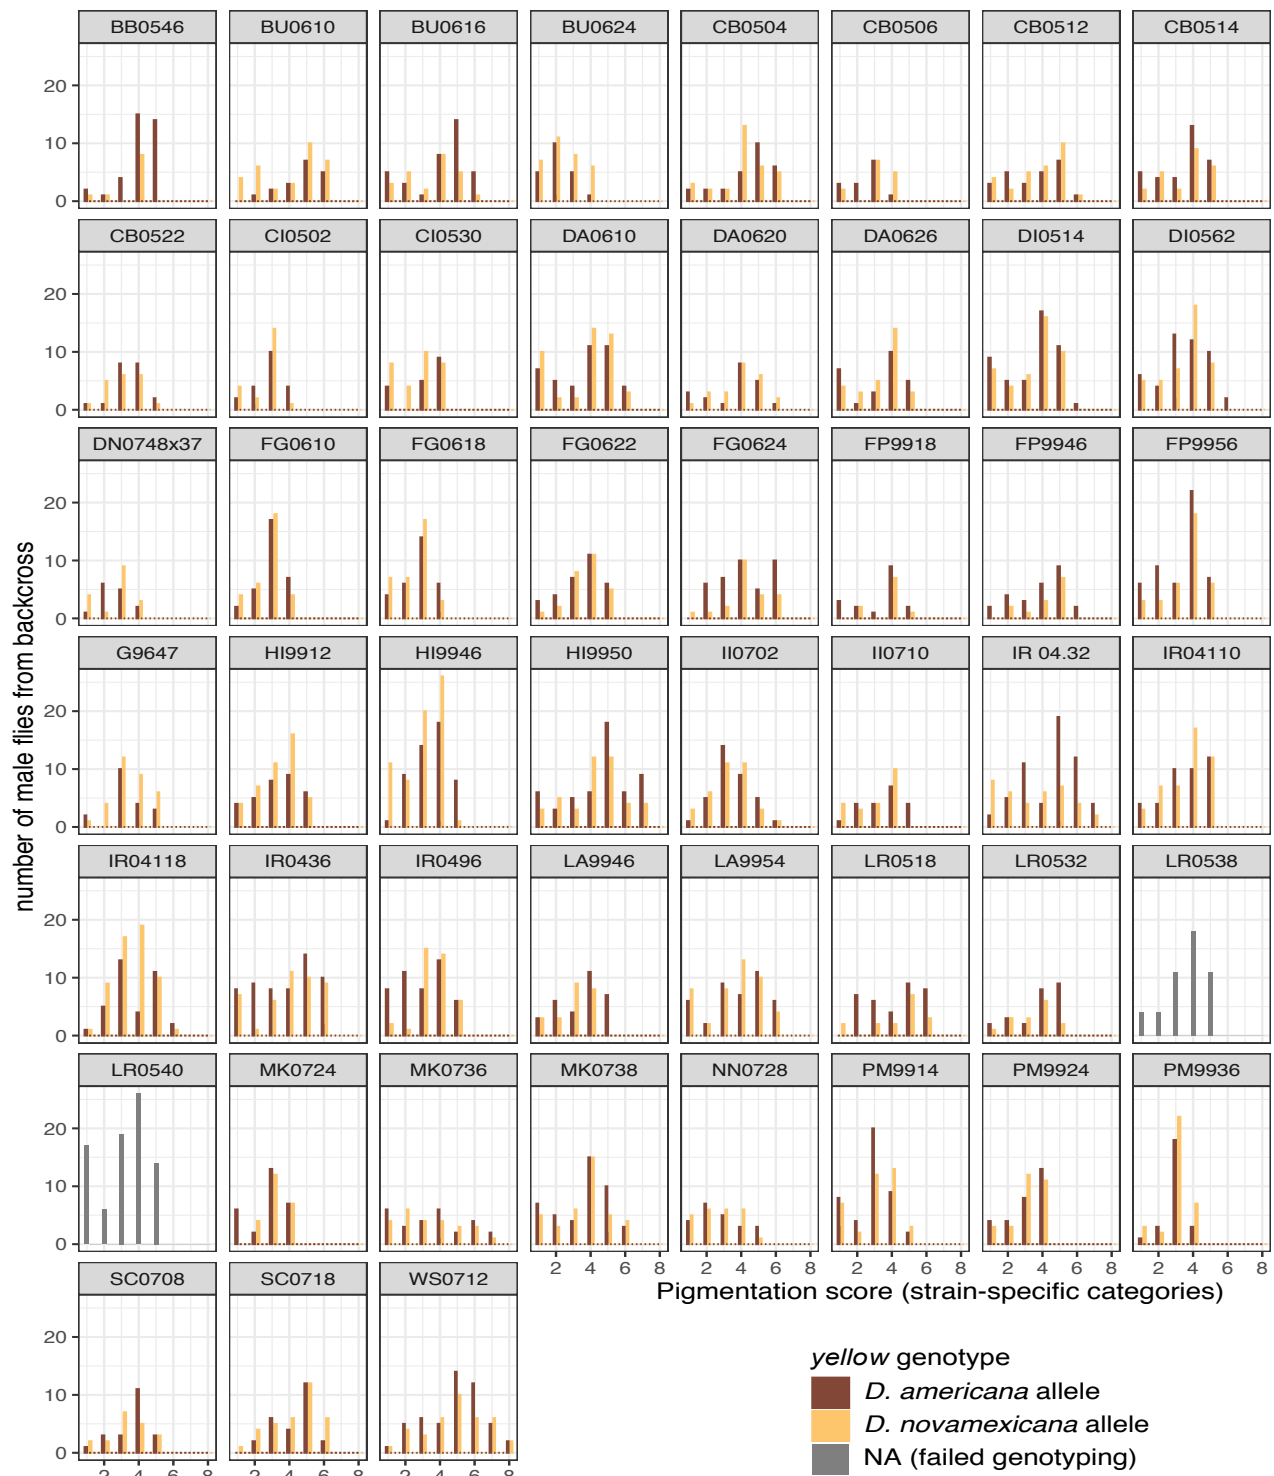

**Supplementary Figure 3. Testing for function divergence of *yellow*.** Distributions of pigmentation phenotypes for backcross progeny inheriting the *D. americana* (brown) or *D. novamexicana* allele (yellow) of the *yellow* gene from their F<sub>1</sub> hybrid mother are shown for each strain of *D. americana* tested, with the strain name shown at the top of each panel. Numbers of males in each pigmentation class are shown rather than proportions to communicate sample sizes. Grey bars are shown for strains LR0538 and LR0540 because the *yellow* genotyping assay failed for all flies, presumably because of sequence differences in these *yellow* alleles.

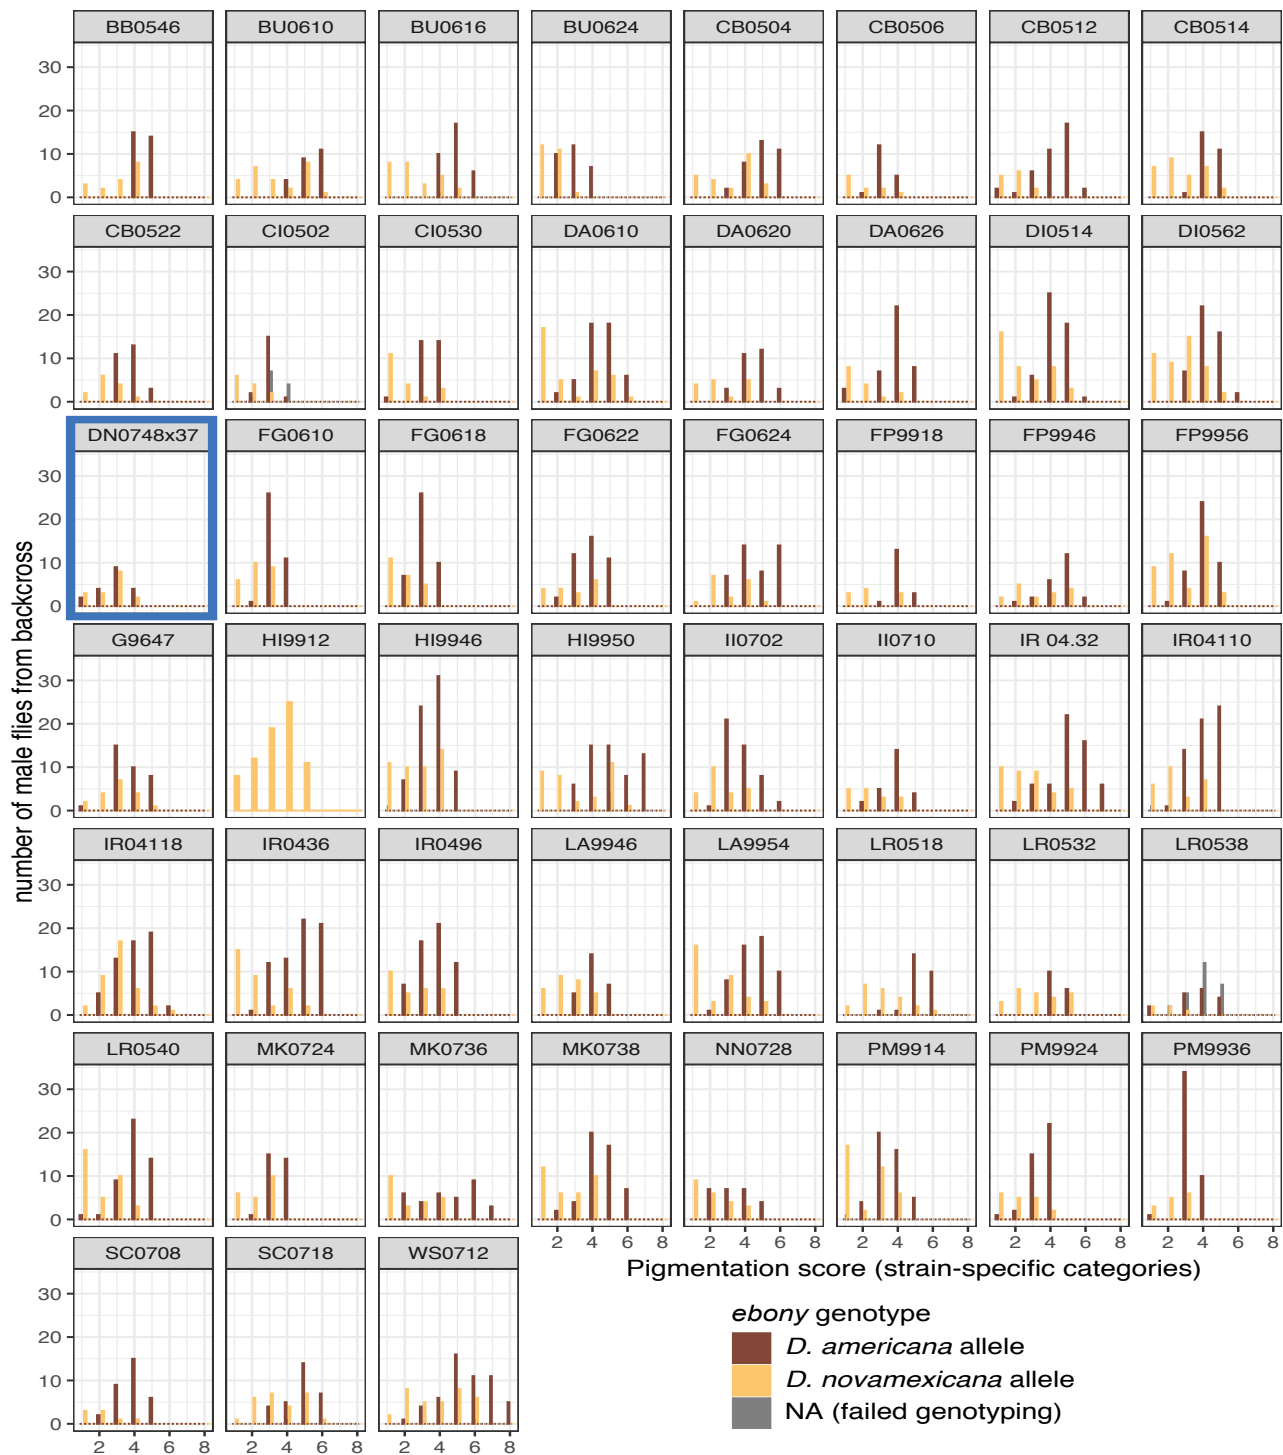

**Supplementary Figure 4. Testing for function divergence of *ebony*.** Distributions of pigmentation phenotypes for backcross progeny inheriting the *D. americana* (brown) or *D. novamexicana* allele (yellow) of the *ebony* gene from their F<sub>1</sub> hybrid mother are shown for each strain of *D. americana* tested, with the stain name shown at the top of each panel. Numbers of males in each pigmentation class are shown rather than proportions to communicate sample sizes. Grey bars indicate samples with failed genotyping reactions, which were most common for *ebony* with flies from strain LR0538. The genotyping assay seemed to fail to differentiate alleles in the backcross with strain HI9912. Dark blue box indicates no significant difference between *D. americana* and *D. novamexicana* alleles.

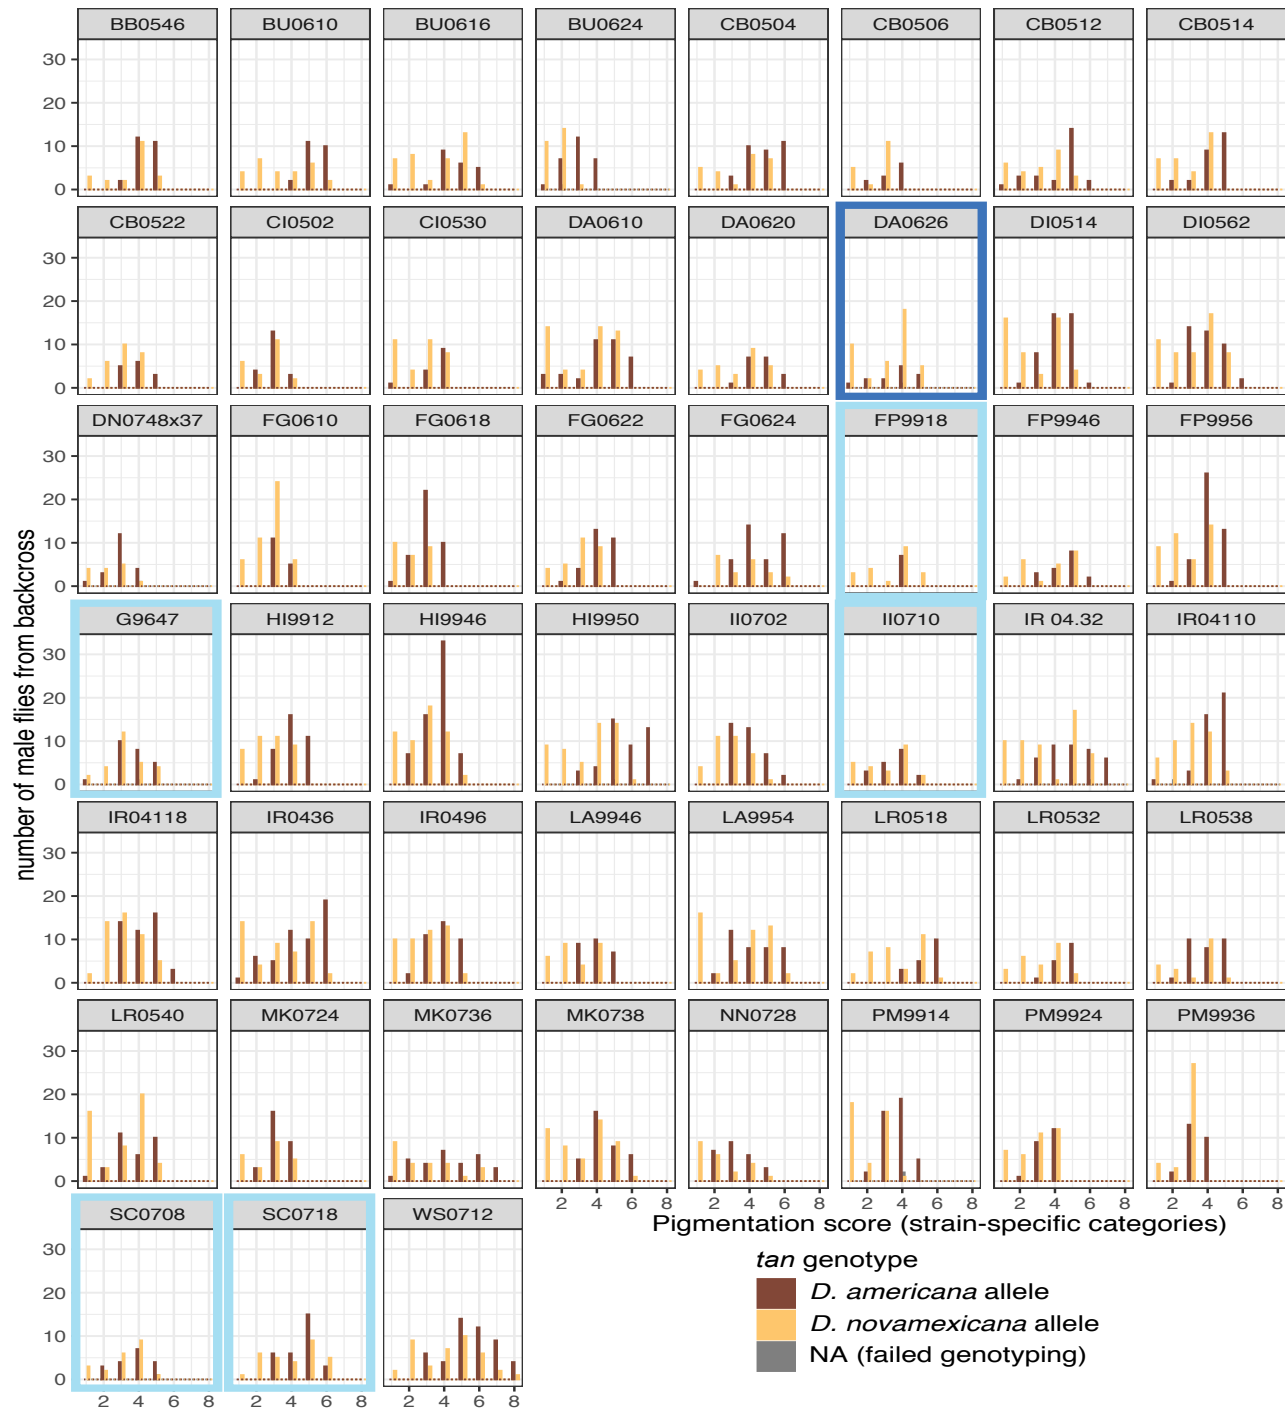

**Supplementary Figure 5. Testing for function divergence of *tan*.** Distributions of pigmentation phenotypes for backcross progeny inheriting the *D. americana* (brown) or *D. novamexicana* allele (yellow) of the *tan* gene from their F<sub>1</sub> hybrid mother are shown for each strain of *D. americana* tested, with the stain name shown at the top of each panel. Numbers of males in each pigmentation class are shown rather than proportions to communicate sample sizes. Grey bars indicate samples with failed genotyping reactions, of which very few were observed for *ebony*. Dark blue box indicates no significant difference between *D. americana* and *D. novamexicana* alleles. Light blue boxes indicate marginal evidence of equivalent alleles (P-values = 0.05 or 0.06).

## **Supplementary Tables**

**Supplementary Table 1.** Summary of strains used for sequence analysis and/or functional testing, including details of sites where their progenitors were collected.

**Supplementary Table 2.** Median pigmentation measure for each fly sampled from each strain of *D. americana* obtained using a custom-built fiber optic probe to measure light reflected off the fly's abdominal cuticle.

**Supplementary Table 3.** Standardization of pigmentation classes among all backcrosses.

**Supplementary Table 4.** *yellow*, *tan*, and *ebony* genotypes for male progeny of F<sub>1</sub> hybrids backcrossed to *D. novamexicana*.

**Supplementary Table 5.** Results of permutation tests used to identify functional differences between *D. americana* and *D. novamexicana* alleles of *yellow*, *tan*, and *ebony*.

**Supplementary Table 6.** Genotypes of sites in *tan* used to test for an association with body pigmentation.

**Supplementary Table 7.** Genotypes of sites in *ebony* used to test for an association with body pigmentation.

**Supplementary Table 8.** Results from general linear models used to test for associations between body pigmentation and variable sites in *tan* and *ebony*.

## **Supplementary Files**

**Supplementary File 1.** FASTA format summary of *ebony* allele sequences analyzed.

**Supplementary File 2.** FASTA format summary of *tan* allele sequences analyzed.

**Supplementary File 3.** Text file containing R code used for all analyses presented in the manuscript.
